# Supplementary material for: Antibacterial and Cytotoxic Activities of Ten Commercially Available Essential Oils
Source: PubMed Central journal article supplement (PMC7589993; doi:10.3390/antibiotics9100717), 2020-10-20
Supplement: antibiotics-09-00717-s001.pdf [file antibiotics-09-00717-s001.pdf]

## Supplementary Material

### Antibacterial and cytotoxic activities of ten essential oils commercially available

Sofia Oliveira Ribeiro <sup>1</sup>, Véronique Fontaine <sup>2</sup>, Véronique Mathieu <sup>3</sup>, Abdesselam Zhiri <sup>4,5</sup>, Dominique Baudoux <sup>4</sup>, Caroline Stévigny <sup>\*1</sup> and Florence Souard <sup>\*6,7</sup>

<sup>1</sup> Department of Research in Drug Development (RD3), Pharmacognosy, Bioanalysis and Drug Discovery Unit, Faculty of Pharmacy, Université libre de Bruxelles, Boulevard du Triomphe, 1050 Brussels, Belgium

<sup>2</sup> Department of Research in Drug Development (RD3), Microbiology, Bioorganic and Macromolecular Chemistry Unit, Faculty of Pharmacy, Université libre de Bruxelles (ULB), Boulevard du Triomphe, 1050 Brussels, Belgium

<sup>3</sup> Department of Pharmacotherapy and Pharmaceutics, Université libre de Bruxelles (ULB), Boulevard du Triomphe, 1050 Brussels, Belgium

<sup>4</sup> Pranarôm International S.A. 37, Avenue des Artisans, 7822, Ghislenghien, Belgium

<sup>5</sup> Unité de recherche en Biotechnologie végétale, Université libre de Bruxelles, CP 300, Rue Prof. Jeener & Brachet 12, 6041 Gosselies, Belgium

<sup>6</sup> Department of Pharmacotherapy and Pharmaceutics (DPP), Pharmacology, Pharmacotherapy and Pharmaceutical care Unit, Faculty of Pharmacy, Université libre de Bruxelles (ULB), Boulevard du Triomphe, 1050 Brussels, Belgium

<sup>7</sup> Université Grenoble Alpes, DPM UMR 5063, F3Y041, Grenoble, France.

\* Equally contributing project leaders

Corresponding author: Sofia Oliveira Ribeiro

Tel.: +32 02 650 52 98

E-mail address: sofia.marilia.oliveira.ribeiro@ulb.be

## Materials and methods

### Synergistic activity between the essential oils and antibiotics

As mentioned in the article, we tested the synergistic activity between the essential oils and common antibiotics by evaluating the Fractional Inhibitory Concentration (FIC) and the FIC index (FICI). The essential oils (EO) were combined with antibiotics (AB) in a 1:1 ratio and serially dilute (from 1000  $\mu\text{g}\cdot\text{ml}^{-1}$  and 64  $\mu\text{g}\cdot\text{ml}^{-1}$ , respectively) in the 96-well plates. The FICI was determined using the following equations:

$$\text{FICI} = \text{FIC}_{\text{AB}} + \text{FIC}_{\text{EO}}$$

$$\text{where : } \text{FIC}_{\text{AB}} = \text{MIC}_{\text{AB in combination with the EO}} / \text{MIC}_{\text{AB alone}}$$

$$\text{FIC}_{\text{EO}} = \text{MIC}_{\text{EO in combination with the AB}} / \text{MIC}_{\text{EO alone}}$$

The four possible types of interaction are :

1. synergy ( $\text{FICI} \leq 0,5$ )
2. additive ( $0,5 < \text{FICI} \leq 1$ )
3. indifferent ( $1 < \text{FICI} \leq 2$ )

#### 4. antagonist (FIC > 2)

The tested strains (and the respective antibiotics tested) were *S. aureus* LMG 15975 (amoxicillin and penicillin V), *S. aureus* LMG 16217 (amoxicillin and penicillin V), *E. coli* LMG 15862 (amoxicillin and penicillin V) and *P. aeruginosa* LMG 6395 (doxycycline and tetracycline). The direct activity leading to obtain the MIC<sub>AB</sub> and the MIC<sub>EO</sub> were made at the same time as the synergistic test where we obtained the MIC<sub>AB/EO</sub> and the MIC<sub>EO/AB</sub>. The tests were made in triplicate.

### Figure of contents

**Table S1a** – Synergistic activity of the ten commercial essential oils (EO) in association with two different antibiotics (AB), the amoxicillin (AMX) and the penicillin V (PEN V) against *Staphylococcus aureus* LMG 15975 (n=3).

**Table S1b** – Synergistic activity of the ten commercial essential oils (EO) in association with two different antibiotics (AB), the amoxicillin (AMX) and the penicillin V (PEN V) against *Staphylococcus aureus* LMG 16217 (n=3).

**Table S1c** – Synergistic activity of the ten commercial essential oils (EO) in association with two different antibiotics (AB), the amoxicillin (AMX) and the penicillin V (PEN V) against *Escherichia coli* LMG 15862 (n=3).

**Table S1d** – Synergistic activity of the ten commercial essential oils (EO) in association with two different antibiotics (AB), the doxycycline (DOX) and the tetracycline (TET) against *Pseudomonas aeruginosa* LMG 6395 (n=3).

**Figure S1** – Certificate of the chemical analysis for the lot number OF17650 of *Trachyspermum ammi* L. (ajowan) provided by Pranarôm. Screen capture made on 1<sup>st</sup> September 2020.

**Figure S2** – Certificate of the chemical analysis for the lot number OF22779 of *Ocimum basilicum ssp basilicum* L. (basil) provided by Pranarôm. Screen capture made on 1<sup>st</sup> September 2020.

**Figure S3** – Certificate of the chemical analysis for the lot number OF22830 of *Matricaria recutita* L. (German chamomile) provided by Pranarôm. Screen capture made on 1<sup>st</sup> September 2020.

**Figure S4** – Certificate of the chemical analysis for the lot number OF22426 of *Cinnamomum cassia* (L.) J. Presl. (Chinese cinnamon) provided by Pranarôm. Screen capture made on 1<sup>st</sup> September 2020.

**Figure S5** – Certificate of the chemical analysis for the lot number OF21374 of *Coriandrum sativum* L. (coriander) provided by Pranarôm. Screen capture made on 1<sup>st</sup> September 2020.

**Figure S6** – Certificate of the chemical analysis for the lot number OF22293 of *Eugenia caryophyllus* (Spreng.) Bullock & S. G. Harrison. (clove) provided by Pranarôm. Screen capture made on 1<sup>st</sup> September 2020.

**Figure S7** – Certificate of the chemical analysis for the lot number OF20407 of *Cymbopogon citratus* (DC.) Stapf. (lemongrass) provided by Pranarôm. Screen capture made on 1<sup>st</sup> September 2020.

**Figure S8** – Certificate of the chemical analysis for the lot number OF19205 of *Lavandula stoechas* L. (Spanish lavender) provided by Pranarôm. Screen capture made on 1<sup>st</sup> September 2020.

**Figure S9** – Certificate of the chemical analysis for the lot number OF22429 of *Origanum compactum* Benth. (oregano) provided by Pranarôm. Screen capture made on 1<sup>st</sup> September 2020.

**Figure S10** – Certificate of the chemical analysis for the lot number OF21237 of *Cymbopogon martinii* var. *motia* (Roxb.) W.Watson (palmarosa) provided by Pranarôm. Screen capture made on 1<sup>st</sup> September 2020.

## Results

**Table S1a** – Synergistic activity of the ten commercial essential oils (EO) in association with two different antibiotics (AB), the amoxicillin (AMX) and the penicillin V (PEN V) against *Staphylococcus aureus* LMG 15975 (n=3).

| <i>S. aureus</i> LMG 15975 |     |                                                           |                                                           |                                                              |                                                              |                   |                   |      |             |
|----------------------------|-----|-----------------------------------------------------------|-----------------------------------------------------------|--------------------------------------------------------------|--------------------------------------------------------------|-------------------|-------------------|------|-------------|
| AB                         | EO  | MIC <sub>AB</sub><br>( $\mu\text{g}\cdot\text{ml}^{-1}$ ) | MIC <sub>EO</sub><br>( $\mu\text{g}\cdot\text{ml}^{-1}$ ) | MIC <sub>AB/EO</sub><br>( $\mu\text{g}\cdot\text{ml}^{-1}$ ) | MIC <sub>EO/AB</sub><br>( $\mu\text{g}\cdot\text{ml}^{-1}$ ) | FIC <sub>AB</sub> | FIC <sub>EO</sub> | FIC  | Interaction |
| AMX                        | /AW | 16                                                        | 500                                                       | 8                                                            | 125                                                          | 0,50              | 0,25              | 0,75 | Additive    |
|                            | /BE | 16                                                        | 2000                                                      | 8                                                            | 125                                                          | 0,50              | 0,06              | 0,56 | Additive    |
|                            | /CA | 16                                                        | 2000                                                      | 8                                                            | 125                                                          | 0,50              | 0,06              | 0,56 | Additive    |
|                            | /CC | 16                                                        | 250                                                       | 4                                                            | 62,5                                                         | 0,25              | 0,25              | 0,50 | Synergy     |
|                            | /CF | 16                                                        | 125                                                       | 2                                                            | 31,25                                                        | 0,13              | 0,25              | 0,38 | Synergy     |
|                            | /GF | 16                                                        | 1000                                                      | 8                                                            | 125                                                          | 0,50              | 0,13              | 0,63 | Additive    |
|                            | /LG | 16                                                        | 1000                                                      | 8                                                            | 125                                                          | 0,50              | 0,13              | 0,63 | Additive    |
|                            | /LS | 16                                                        | 2000                                                      | 8                                                            | 125                                                          | 0,50              | 0,06              | 0,56 | Additive    |
|                            | /OC | 16                                                        | 500                                                       | 4                                                            | 62,5                                                         | 0,25              | 0,13              | 0,38 | Synergy     |
|                            | /PM | 16                                                        | 2000                                                      | 8                                                            | 125                                                          | 0,50              | 0,06              | 0,56 | Additive    |
| PEN V                      | /AW | 8                                                         | 500                                                       | 4                                                            | 62,5                                                         | 0,50              | 0,13              | 0,63 | Additive    |
|                            | /BE | 8                                                         | 2000                                                      | 8                                                            | 125                                                          | 1,00              | 0,06              | 1,06 | Indifferent |
|                            | /CA | 8                                                         | 2000                                                      | 4                                                            | 62,5                                                         | 0,50              | 0,03              | 0,53 | Additive    |
|                            | /CC | 8                                                         | 250                                                       | 4                                                            | 62,5                                                         | 0,50              | 0,25              | 0,75 | Additive    |
|                            | /CF | 8                                                         | 125                                                       | 4                                                            | 62,5                                                         | 0,50              | 0,50              | 1,00 | Additive    |
|                            | /GF | 8                                                         | 1000                                                      | 4                                                            | 62,5                                                         | 0,50              | 0,06              | 0,56 | Additive    |
|                            | /LG | 8                                                         | 1000                                                      | 4                                                            | 62,5                                                         | 0,50              | 0,06              | 0,56 | Additive    |
|                            | /LS | 8                                                         | 2000                                                      | 4                                                            | 62,5                                                         | 0,50              | 0,03              | 0,53 | Additive    |
|                            | /OC | 8                                                         | 500                                                       | 4                                                            | 62,5                                                         | 0,50              | 0,13              | 0,63 | Additive    |
|                            | /PM | 8                                                         | 2000                                                      | 8                                                            | 125                                                          | 1,00              | 0,06              | 1,06 | Indifferent |

**Table S2b** – Synergistic activity of the ten commercial essential oils (EO) in association with two different antibiotics (AB), the amoxicillin (AMX) and the penicillin V (PEN V) against *Staphylococcus aureus* LMG 16217 (n=3).

| <i>S. aureus</i> LMG 16217 |     |                                                           |                                                           |                                                              |                                                              |                   |                   |      |             |
|----------------------------|-----|-----------------------------------------------------------|-----------------------------------------------------------|--------------------------------------------------------------|--------------------------------------------------------------|-------------------|-------------------|------|-------------|
| AB                         | EO  | MIC <sub>AB</sub><br>( $\mu\text{g}\cdot\text{ml}^{-1}$ ) | MIC <sub>EO</sub><br>( $\mu\text{g}\cdot\text{ml}^{-1}$ ) | MIC <sub>AB/EO</sub><br>( $\mu\text{g}\cdot\text{ml}^{-1}$ ) | MIC <sub>EO/AB</sub><br>( $\mu\text{g}\cdot\text{ml}^{-1}$ ) | FIC <sub>AB</sub> | FIC <sub>EO</sub> | FIC  | Interaction |
| AMX                        | /AW | 64                                                        | 500                                                       | 16                                                           | 250                                                          | 0,25              | 0,50              | 0,75 | Additive    |
|                            | /BE | 64                                                        | 2000                                                      | 64                                                           | 1000                                                         | 1,00              | 0,50              | 1,50 | Indifferent |
|                            | /CA | 64                                                        | 2000                                                      | 32                                                           | 500                                                          | 0,50              | 0,25              | 0,75 | Additive    |
|                            | /CC | 64                                                        | 250                                                       | 8                                                            | 125                                                          | 0,13              | 0,50              | 0,63 | Additive    |
|                            | /CF | 64                                                        | 125                                                       | 4                                                            | 62,5                                                         | 0,06              | 0,50              | 0,56 | Additive    |
|                            | /GF | 64                                                        | 1000                                                      | 32                                                           | 500                                                          | 0,50              | 0,50              | 1,00 | Indifferent |
|                            | /LG | 64                                                        | 500                                                       | 8                                                            | 125                                                          | 0,13              | 0,25              | 0,38 | Synergy     |
|                            | /LS | 64                                                        | 2000                                                      | 32                                                           | 500                                                          | 0,50              | 0,25              | 0,75 | Additive    |
|                            | /OC | 64                                                        | 250                                                       | 8                                                            | 125                                                          | 0,13              | 0,50              | 0,63 | Additive    |
|                            | /PM | 64                                                        | 2000                                                      | 32                                                           | 500                                                          | 0,50              | 0,25              | 0,75 | Additive    |
| PEN V                      | /AW | 64                                                        | 500                                                       | 16                                                           | 250                                                          | 0,25              | 0,50              | 0,75 | Additive    |
|                            | /BE | 64                                                        | 2000                                                      | 64                                                           | 1000                                                         | 1,00              | 0,50              | 1,50 | Indifferent |
|                            | /CA | 64                                                        | 2000                                                      | 16                                                           | 250                                                          | 0,25              | 0,13              | 0,38 | Synergy     |



|     |    |      |    |     |      |      |      |             |
|-----|----|------|----|-----|------|------|------|-------------|
| /CC | 64 | 250  | 8  | 125 | 0,13 | 0,50 | 0,63 | Additive    |
| /CF | 64 | 125  | 8  | 125 | 0,13 | 1,00 | 1,13 | Indifferent |
| /GF | 64 | 1000 | 16 | 250 | 0,25 | 0,25 | 0,50 | Synergy     |
| /LG | 64 | 500  | 16 | 250 | 0,25 | 0,50 | 0,75 | Additive    |
| /LS | 64 | 2000 | 32 | 500 | 0,50 | 0,25 | 0,75 | Additive    |
| /OC | 64 | 250  | 16 | 250 | 0,25 | 1,00 | 1,25 | Indifferent |
| /PM | 64 | 2000 | 32 | 500 | 0,50 | 0,25 | 0,75 | Additive    |

**Table S3c** – Synergistic activity of the ten commercial essential oils (EO) in association with two different antibiotics (AB), the amoxicillin (AMX) and the penicillin V (PEN V) against *Escherichia coli* LMG 15862 (n=3).

| <i>E. coli</i> LMG 15862 |     |                                             |                                             |                                                |                                                |                   |                   |             |             |
|--------------------------|-----|---------------------------------------------|---------------------------------------------|------------------------------------------------|------------------------------------------------|-------------------|-------------------|-------------|-------------|
| AB                       | EO  | MIC <sub>AB</sub><br>(µg.ml <sup>-1</sup> ) | MIC <sub>EO</sub><br>(µg.ml <sup>-1</sup> ) | MIC <sub>AB/EO</sub><br>(µg.ml <sup>-1</sup> ) | MIC <sub>EO/AB</sub><br>(µg.ml <sup>-1</sup> ) | FIC <sub>AB</sub> | FIC <sub>EO</sub> | FIC         | Interaction |
| AMX                      | /AW | 128                                         | 1000                                        | 64                                             | 1000                                           | 0,50              | 1,00              | 1,50        | Indifferent |
|                          | /BE | 128                                         | 2000                                        | 128                                            | 2000                                           | 1,00              | 1,00              | 2,00        | Indifferent |
|                          | /CA | 128                                         | 2000                                        | 128                                            | 2000                                           | 1,00              | 1,00              | 2,00        | Indifferent |
|                          | /CC | 128                                         | 500                                         | 32                                             | 500                                            | 0,25              | 1,00              | 1,25        | Indifferent |
|                          | /CF | 128                                         | 2000                                        | 128                                            | 2000                                           | 1,00              | 1,00              | 2,00        | Indifferent |
|                          | /GF | 128                                         | 1000                                        | 64                                             | 1000                                           | 0,50              | 1,00              | 1,50        | Indifferent |
|                          | /LG | 128                                         | 2000                                        | 128                                            | 2000                                           | 1,00              | 1,00              | 2,00        | Indifferent |
|                          | /LS | 128                                         | 2000                                        | 128                                            | 2000                                           | 1,00              | 1,00              | 2,00        | Indifferent |
|                          | /OC | 128                                         | 500                                         | 32                                             | 500                                            | 0,25              | 1,00              | 1,25        | Indifferent |
| /PM                      | 128 | 1000                                        | 64                                          | 1000                                           | 0,50                                           | 1,00              | 1,50              | Indifferent |             |

|       |     |      |      |      |      |      |      |             |             |
|-------|-----|------|------|------|------|------|------|-------------|-------------|
| PEN V | /AW | 128  | 1000 | 64   | 1000 | 0,50 | 1,00 | 1,50        | Indifferent |
|       | /BE | 128  | 2000 | 128  | 2000 | 1,00 | 1,00 | 2,00        | Indifferent |
|       | /CA | 128  | 2000 | 128  | 2000 | 1,00 | 1,00 | 2,00        | Indifferent |
|       | /CC | 128  | 500  | 32   | 500  | 0,25 | 1,00 | 1,25        | Indifferent |
|       | /CF | 128  | 2000 | 128  | 2000 | 1,00 | 1,00 | 2,00        | Indifferent |
|       | /GF | 128  | 1000 | 64   | 1000 | 0,50 | 1,00 | 1,50        | Indifferent |
|       | /LG | 128  | 2000 | 128  | 2000 | 1,00 | 1,00 | 2,00        | Indifferent |
|       | /LS | 128  | 2000 | 128  | 2000 | 1,00 | 1,00 | 2,00        | Indifferent |
|       | /OC | 128  | 500  | 32   | 500  | 0,25 | 1,00 | 1,25        | Indifferent |
| /PM   | 128 | 1000 | 64   | 1000 | 0,50 | 1,00 | 1,50 | Indifferent |             |

**Table S4d** – Synergistic activity of the ten commercial essential oils (EO) in association with two different antibiotics (AB), the doxycycline (DOX) and the tetracycline (TET) against *Pseudomonas aeruginosa* LMG 6395 (n=3).

| <i>P. aeruginosa</i> LMG 6395 |     |                                             |                                             |                                                |                                                |                   |                   |      |             |
|-------------------------------|-----|---------------------------------------------|---------------------------------------------|------------------------------------------------|------------------------------------------------|-------------------|-------------------|------|-------------|
| AB                            | EO  | MIC <sub>AB</sub><br>(µg.ml <sup>-1</sup> ) | MIC <sub>EO</sub><br>(µg.ml <sup>-1</sup> ) | MIC <sub>AB/EO</sub><br>(µg.ml <sup>-1</sup> ) | MIC <sub>EO/AB</sub><br>(µg.ml <sup>-1</sup> ) | FIC <sub>AB</sub> | FIC <sub>EO</sub> | FIC  | Interaction |
| DOX                           | /AW | 16                                          | 2000                                        | 16                                             | 250                                            | 1,00              | 0,13              | 1,13 | Indifferent |
|                               | /BE | 16                                          | 2000                                        | 8                                              | 125                                            | 0,50              | 0,06              | 0,56 | Additive    |
|                               | /CA | 16                                          | 2000                                        | 8                                              | 125                                            | 0,50              | 0,06              | 0,56 | Additive    |
|                               | /CC | 16                                          | 500                                         | 16                                             | 250                                            | 1,00              | 0,50              | 1,50 | Indifferent |
|                               | /CF | 16                                          | 2000                                        | 8                                              | 125                                            | 0,50              | 0,06              | 0,56 | Additive    |
|                               | /GF | 16                                          | 2000                                        | 16                                             | 250                                            | 1,00              | 0,13              | 1,13 | Indifferent |
|                               | /LG | 16                                          | 2000                                        | 8                                              | 125                                            | 0,50              | 0,06              | 0,56 | Additive    |
|                               | /LS | 16                                          | 2000                                        | 8                                              | 125                                            | 0,50              | 0,06              | 0,56 | Additive    |

|     |     |      |      |     |      |      |      |             |             |
|-----|-----|------|------|-----|------|------|------|-------------|-------------|
|     | /OC | 16   | 500  | 16  | 250  | 1,00 | 0,50 | 1,50        | Indifferent |
|     | /PM | 16   | 2000 | 8   | 125  | 0,50 | 0,06 | 0,56        | Additive    |
| TET | /AW | 16   | 2000 | 16  | 250  | 1,00 | 0,13 | 1,13        | Indifferent |
|     | /BE | 16   | 2000 | 16  | 250  | 1,00 | 0,13 | 1,13        | Indifferent |
|     | /CA | 16   | 2000 | 16  | 250  | 1,00 | 0,13 | 1,13        | Indifferent |
|     | /CC | 16   | 500  | 16  | 250  | 1,00 | 0,50 | 1,50        | Indifferent |
|     | /CF | 16   | 2000 | 16  | 250  | 1,00 | 0,13 | 1,13        | Indifferent |
|     | /GF | 16   | 2000 | 16  | 250  | 1,00 | 0,13 | 1,13        | Indifferent |
|     | /LG | 16   | 2000 | 16  | 250  | 1,00 | 0,13 | 1,13        | Indifferent |
|     | /LS | 16   | 2000 | 16  | 250  | 1,00 | 0,13 | 1,13        | Indifferent |
|     | /OC | 16   | 500  | 16  | 250  | 1,00 | 0,50 | 1,50        | Indifferent |
| /PM | 16  | 2000 | 16   | 250 | 1,00 | 0,13 | 1,13 | Indifferent |             |

Figure S1 (page 1/4) – Certificate of the chemical analysis for the lot number OF17650 of *Trachyspermum ammi* L. (ajowan) provided by Pranarôm. Screen capture made 1<sup>st</sup> September 2020.



## FICHE D'ANALYSE – ANALYSIS SHEET

### Huile essentielle – Essential oil

Nom botanique – botanical name : *Trachyspermum ammi*  
 Nom commun – french name: AJOWAN  
 Numéro du lot - lot number: OF17650  
 Origine - origin: ---- PRANARÔM - INDE  
 Partie de la plante – part of the plant: FRUIT  
 Date de distillation – distillation date : 06/2014  
 Date de péremption – out of date : 09/2019

**Caractéristiques d'analyse – analysis characteristics:**

CPG - SM HEWLETT PACKARD / CPG-FID  
 Colonne : HP INNOWAX 60-0.5-0.25  
 Programmation de température : 6 mm à 50°C -2°C/mm→250°C-20mm à 250°C  
 Gaz vecteur He : 22 psis

**Caractéristiques physiques – physical characteristics :**

|                                                |                                                           |
|------------------------------------------------|-----------------------------------------------------------|
| Aspect – physical state                        | Liquide limpide                                           |
| Couleur - colour                               | Jaune d'or                                                |
| Odeur - odour                                  | Phénolique, caractéristique                               |
| Densité à 20°C - density                       | 0,910                                                     |
| Densité à 15°C - density                       | 0,914                                                     |
| Indice de réfraction à 20°C - refractive index | 1,497 5                                                   |
| Pouvoir rotatoire à 20°C – optical rotation    | - 1 °                                                     |
| Miscibilité à l'éthanol à 80% - miscibility    | 1,4 volumes d'alcool / 1 volume d'HE (légère opalescence) |
| Point d'éclair : SETAFLASH - flashpoint        | 58,0 °C                                                   |

**Analyses pesticides – pesticide analysis :**

|                                                                                                                                                                                                                                                                                                                                                                                                                                                                                                                                                                                                                                                                                                                                                                                                                                                                                                                                                                                                                                          |                                                                              |
|------------------------------------------------------------------------------------------------------------------------------------------------------------------------------------------------------------------------------------------------------------------------------------------------------------------------------------------------------------------------------------------------------------------------------------------------------------------------------------------------------------------------------------------------------------------------------------------------------------------------------------------------------------------------------------------------------------------------------------------------------------------------------------------------------------------------------------------------------------------------------------------------------------------------------------------------------------------------------------------------------------------------------------------|------------------------------------------------------------------------------|
| <b>Pesticides Organochlorés : Dosage par GC MS détecteur XSD (méthode multirésidus interne validée selon la norme NF V03-110)</b><br><b>Liste des pesticides recherchés (Pharmacopée Européenne):</b> Alachlor, Aldrine, Bromophos Ethyl, Bromophos Méthyl, Chlordane, Chlorfenvinphos, Chlorpyrifos, Chlorpyrifos Méthyl, Chlorthal Diméthyl, Cyfluthrine, Cyhalothrine lambda, Cyperméthrine, Dichlofuanide, Dichlorvos, Dicosol (Kelthane), Dieldrine, Endosulfan, Endosulfan sulfate, Endrine, Fenchlorphos (Ronnel), Fenchlorphos-oxon, Fenvalerate, Fluralinate, Heptachlor, Heptachlor epoxide, Hexachlorobenzène, Hexachlorocyclohexane $\alpha$ , Hexachlorocyclohexane $\beta$ , Hexachlorocyclohexane $\delta$ , Hexachlorocyclohexane $\epsilon$ , Lindane, Methoxychlor, Mirex, Naled, o,p'-DDD, o,p'-DDE, o,p'-DDT, Oxychlordane, p,p'-DDD, p,p'-DDE, p,p'-DDT, Pentachloroaniline, Pentachloroanisole, Permethrine, Phosalone, Procyimdone, Profenophos, Prothiofos, Quintozene, S421, Tecnazene, Tetradifon, Vinlozoline | <b>Résultats</b><br><br>< LMR*<br><br>* Limite Maximale de Résidus autorisée |
| <b>Pesticides Organophosphorés : Dosage par GC MS détecteur FPD (méthode multirésidus interne validée selon la norme NF V03-110)</b><br><b>Liste des pesticides recherchés (Pharmacopée Européenne):</b> Acephate, Azinphos Ethyl, Azinphos Méthyl, Bromophos Ethyl, Bromophos Méthyl, Chlorfenvinphos, Chlorpyrifos, Chlorpyrifos Méthyl, Diazinon, Dichlorvos, Diméthoate, Ethion, Etriphos, Fenchlorphos (Ronnel), Fenchlorphos-oxon, Fenthothion, Fensulfiothion (Dasanit), Fensulfiothion-oxon, Fensulfiothion-oxon-sulfone, Fensulfiothion-sulfone, Fenthion, Fenthion-oxon, Fenthion-oxon-sulfone, Fenthion-oxon-sulfoxyde, Fenthion-sulfone, Fenthion-sulfoxyde, Fonofos, Malaaxon, Malathion, Mecarbam, Methacrifos, Methamidophos (Mantor), Methidathion, Monocrotophos, Naled, Ométhoate, Paraoxon, Paraoxon Méthyl, Parathion Ethyl, Parathion Méthyl, Phosalone, Phosmet, Pirimiphos Ethyl, Pirimiphos Méthyl, Profenophos, Prothiofos, Quinalphos.                                                                         | <b>Résultats</b><br><br>< LMR*<br><br>* Limite Maximale de Résidus autorisée |

## Profil CHROMATOGRAPHIQUE

FD1A, (PRANAROMITA144618.D)

Figure S1 (page 2/4) – Certificate of the chemical analysis for the lot number OF17650 of *Trachyspermum ammi* L. (ajowan) provided by Pranarôm. Screen capture made 1<sup>st</sup> September 2020.

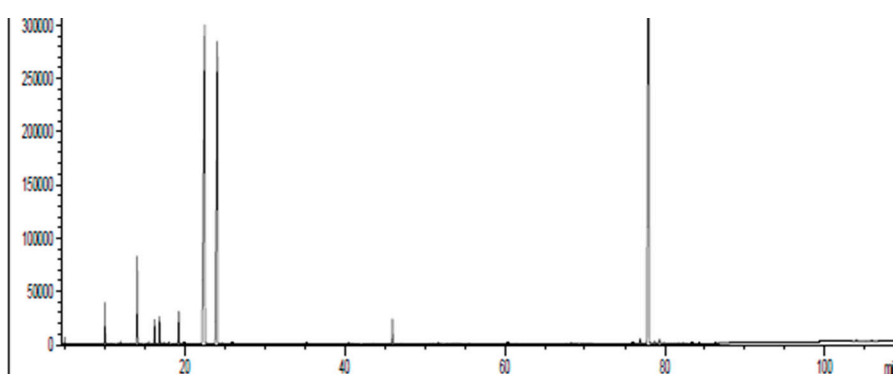

## Tableau de résultats 1 : AJOWAN INDE

LOT N° OF17650

| Pics | Temps de rétention | Constituants     | %    |
|------|--------------------|------------------|------|
| 1    | 5,0                | ETHANOL          | 0,09 |
| 2    | 9,8                | p-MENTHANE       | 0,01 |
| 3    | 10,0               | α-PINENE         | 1,18 |
| 4    | 10,8               | MENTHANE ISOMERE | 0,02 |
| 5    | 11,6               | α-FENCHENE       | 0,02 |
| 6    | 12,0               | CAMPHENE         | 0,07 |
| 7    | 13,2               | MENTHENE ISOMERE | 0,01 |
| 8    | 14,1               | β-PINENE         | 3,04 |
| 9    | 14,7               | PINADIENE        | 0,01 |
| 10   | 15,3               | Δ2-CARENE        | 0,02 |
| 11   | 15,5               | p-MENTH-2-ENE    | 0,09 |
| 12   | 16,3               | Δ3-CARENE        | 0,79 |
| 13   | 16,9               | β-MYRCENE        | 0,84 |

**Figure S1 (page 3/4)** – Certificate of the chemical analysis for the lot number OF17650 of *Trachyspermum ammi* L. (ajowan) provided by Pranarôm. Screen capture made 1<sup>st</sup> September 2020.

|    |      |                               |       |
|----|------|-------------------------------|-------|
| 18 | 19,3 | LIMONENE                      | 1,15  |
| 19 | 19,9 | 1,8-CINEOLE                   | 0,06  |
| 20 | 20,0 | β-PHELLANDRENE                | 0,05  |
| 21 | 22,5 | γ-TERPINENE                   | 27,44 |
| 22 | 24,1 | p-CYMENE                      | 20,55 |
| 23 | 24,7 | TERPINOLENE                   | 0,05  |
| 24 | 25,9 | CYMENE ISOMERE                | 0,03  |
| 25 | 35,0 | CETONE TERPENIQUE             | 0,02  |
| 26 | 35,2 | α,p-DIMETHYLSTYRENE           | 0,06  |
| 27 | 35,5 | MENTHATRIENE ISOMERE          | 0,01  |
| 28 | 40,3 | EPOXYDE TERPENIQUE            | 0,03  |
| 29 | 40,5 | EPOXYDE TERPENIQUE            | 0,07  |
| 30 | 41,0 | EPOXYDE TERPENIQUE ISOMERE    | 0,02  |
| 31 | 43,7 | 4-CARANONE                    | 0,01  |
| 32 | 44,1 | TERPINENE-1-OL                | 0,02  |
| 33 | 44,5 | FENCHOL                       | 0,03  |
| 34 | 45,6 | HYDRATE DE CAMPHENE           | 0,02  |
| 35 | 46,0 | TERPINENE-4-OL                | 0,92  |
| 36 | 48,4 | BICYCLOHEPTYL BUTANONE Mw=166 | 0,01  |
| 37 | 49,2 | Trans-PINOCARVEOL             | 0,02  |
| 38 | 50,0 | ALCOOL TERPENIQUE             | 0,01  |
| 39 | 50,6 | Trans-VERBENOL                | 0,01  |
| 40 | 51,0 | NERAL                         | 0,02  |
| 41 | 51,7 | α-TERPINEOL                   | 0,06  |
| 42 | 52,0 | BORNEOL                       | 0,02  |
| 43 | 52,8 | ESTER TERPENIQUE              | 0,03  |
| 44 | 54,0 | PIPERITONE                    | 0,01  |
| 45 | 54,5 | CARVONE                       | 0,01  |

## Tableau de résultats 2 : AJOWAN INDE

LOT N° OF17650

| Pics | Temps de rétention | Constituants                             | %            |
|------|--------------------|------------------------------------------|--------------|
| 46   | 57,3               | MYRTENOL                                 | 0,01         |
| 47   | 59,7               | Trans-CARVEOL                            | 0,02         |
| 48   | 60,4               | p-CYMENE-8-OL                            | 0,04         |
| 49   | 65,6               | PIPERITENONE                             | 0,02         |
| 50   | 67,6               | COMPOSÉ PHENOLIQUE                       | 0,01         |
| 51   | 68,3               | β-METHYL BENZENE PROPANOL                | 0,03         |
| 52   | 68,6               | COMPOSÉ THYMOL ETHER                     | 0,01         |
| 53   | 69,0               | METHYL ETHYL PHENOL Mw=178               | 0,01         |
| 54   | 69,5               | METHYL DIISOPROPYL PHENOL ISOMERE Mw=192 | 0,01         |
| 55   | 70,9               | SESQUITERPENOL                           | 0,02         |
| 56   | 71,7               | p-MENTHA-1,4-DIEN-7-OL                   | 0,02         |
| 57   | 73,1               | p-CRESOL                                 | 0,01         |
| 58   | 74,1               | CUMINOL                                  | 0,03         |
| 59   | 76,0               | MENTHADIENOL ISOMERE                     | 0,04         |
| 60   | 76,9               | ISOTHYMOL                                | 0,18         |
| 61   | 78,0               | <b>THYMOL</b>                            | <b>41,92</b> |
| 62   | 78,8               | ISOCARVACROL                             | 0,09         |
| 63   | 79,2               | GERANYLGERANIADIENE ISOMERE              | 0,06         |
| 64   | 79,4               | CARVACROL                                | 0,18         |
| 65   | 79,9               | COMPOSÉ PHENOLIQUE                       | 0,02         |
| 66   | 81,8               | METHYL PROPYL PHENOL ISOMERE             | 0,02         |
| 67   | 83,4               | COMPOSÉ PHENOLIQUE                       | 0,01         |
| 68   | 84,3               | COMPOSÉ AROMATIQUE Mw=192                | 0,01         |
| 69   | 88,1               | COMPOSÉ AROMATIQUE                       | 0,05         |
| 70   | 88,3               | COMPOSÉ PHENOLIQUE                       | 0,02         |
| 71   | 90,6               | COMPOSÉ AROMATIQUE                       | 0,02         |

Figure S1 (page 4/4) – Certificate of the chemical analysis for the lot number OF17650 of *Trachyspermum ammi* L. (ajowan) provided by Pranarôm. Screen capture made 1<sup>st</sup> September 2020.

Pranarôm Int.  
C. Schulze  
Contrôle qualité

**FICHE D'ANALYSE – ANALYSIS SHEET**

Huile essentielle – Essential oil

Nom botanique – botanical name : *Ocimum basilicum Organic*  
 Nom commun – french name : BASILIC EXOTIQUE BIOLOGIQUE  
 Numéro du lot – lot number : OF22779  
 Origine - origin : --- PRANARÔM - INDE  
 Partie de la plante – part of the plant : SOMMITÉ FLEURIE  
 Date de distillation – distillation date : 06/2015  
 Date de p éremption – out of date : 04/2021

**Caractéristiques d'analyse – analysis characteristics:**

CPG - SM HEWLETT PACKARD / CPG-FID  
 Colonne : HP INNOWAX 60-0.5-0.25  
 Programmation de température : 6 mn à 50°C -2 °C/mn→250°C -10mn à 250°C  
 Gaz vecteur He : 22 psis

**Caractéristiques physiques – physical characteristics:**

|                                                |                                            |
|------------------------------------------------|--------------------------------------------|
| Aspect – physical state                        | Liquide limpide                            |
| Couleur - colour                               | Jaune très clair                           |
| Odeur - odour                                  | Caractéristique, épicée                    |
| Densité à 20°C - density                       | 0,938                                      |
| Densité à 15°C - density                       | 0,942                                      |
| Indice de réfraction à 20°C – refractive index | 1,504 7                                    |
| Pouvoir rotatoire à 20°C - optical rotation    | -7,5 °C                                    |
| Miscibilité à l'éthanol à 80% - miscibility    | 2,5 volumes d'alcool à 80% / 1 volume d'HE |
| Point d'éclair : SETAFLASH - flashpoint        | 80,7 °C                                    |

**Analyses pesticides – pesticide analysis :**

|                                                                                                                                                                                                                                                                                                                                                                                                                                                                                                                                                                                                                                                                                                                                                                                                                                                                                                                                                                                                                             |                                                                              |
|-----------------------------------------------------------------------------------------------------------------------------------------------------------------------------------------------------------------------------------------------------------------------------------------------------------------------------------------------------------------------------------------------------------------------------------------------------------------------------------------------------------------------------------------------------------------------------------------------------------------------------------------------------------------------------------------------------------------------------------------------------------------------------------------------------------------------------------------------------------------------------------------------------------------------------------------------------------------------------------------------------------------------------|------------------------------------------------------------------------------|
| <b>Pesticides Organochlorés : Dosage par GC MS détecteur XSD (méthode multirésidus Interne validée selon la norme NF V03-110)</b><br><b>Liste des pesticides recherchés (Pharmacopée Européenne):</b> Alachlor, Aldrine, Bromophos Ethyl, Bromophos Methyl, Chlordane, Chlorfenvinphos, Chlorpyrifos, Chlorpyrifos Methyl, Chlorthal Dimethyl, Cyfluthrine, Cyhalothrine lambda, Cyperméthrine, Dichlorofuamide, Dichlorvos, Dicofof (Kelthane), Dieldrine, Endosulfan, Endosulfan sulfate, Endrine, Fenchlorphos (Ronnel), Fenchlorphos-oxon, Fenvalerate, Fluralinate, Heptachlor, Heptachlor epoxide, Hexachlorobenzene, Hexachlorocyclohexane alpha, Hexachlorocyclohexane beta, Hexachlorocyclohexane delta, Hexachlorocyclohexane epsilon, Lindane, Methoxychlore, Mirex, Naled, o,p'-DDD, o,p'-DDE, o,p'-DDT, Oxychlordane, p,p'-DDD, p,p'-DDE, p,p'-DDT, Pentachloroaniline, Pentachloroisole, Permethrine, Phosalone, Procymidone, Profenophos, Prothiofos, Quintozene, S421, Technazene, Tetradifon, Vinclozoline | <b>Résultats</b><br><br>< LMR*<br><br>* Limite Maximale de Résidus autorisée |
| <b>Pesticides Organophosphorés : Dosage par GC MS détecteur FPD (méthode multirésidus Interne validée selon la norme NF V03-110)</b><br>Méthyl, Parathion Ethyl, Parathion Methyl, Phosalone, Phosmet, Pirimiphos Ethyl, Pirimiphos Methyl, Profenophos, Prothiofos, Quinalphos.                                                                                                                                                                                                                                                                                                                                                                                                                                                                                                                                                                                                                                                                                                                                            | <b>Résultats</b><br><br>* Limite Maximale de Résidus autorisée               |

Figure S2 (page 1/4) – Certificate of the chemical analysis for the lot number OF22779 of *Ocimum basilicum ssp basilicum* L. (basil) provided by Pranarôm. Screen capture made on 1st September 2020.

## Profil CHROMATOGRAPHIQUE

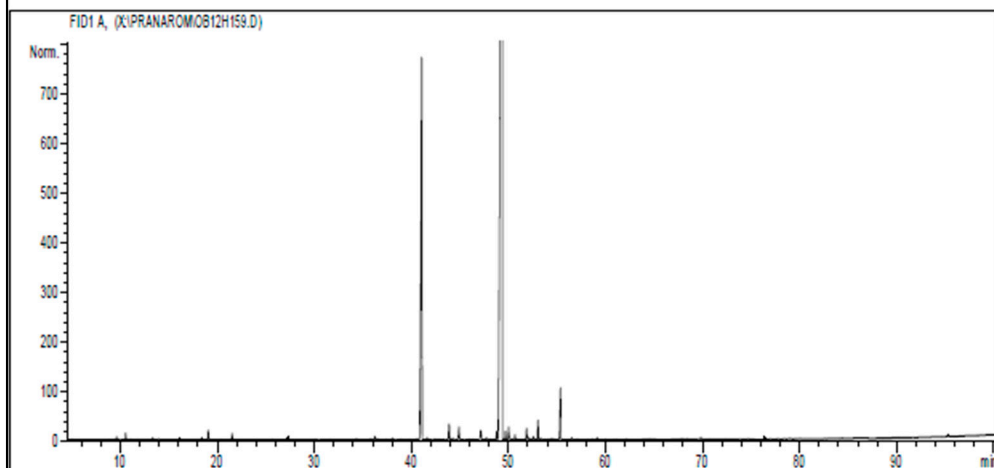

**Figure S2 (page 2/4)** – Certificate of the chemical analysis for the lot number OF22779 of *Ocimum basilicum ssp basilicum* L. (basil) provided by Pranarôm. Screen capture made on 1st September 2020.





Figure S2 (page 3/4) – Certificate of the chemical analysis for the lot number OF22779 of *Ocimum basilicum ssp basilicum* L. (basil) provided by Pranarôm. Screen capture made on 1st September 2020.

## Tableau de résultats 1 : BASILIC BIO

LOT N° OF22779

| Pics | Temps de rétention | Constituants                              | %     |
|------|--------------------|-------------------------------------------|-------|
| 1    | 5,1                | ACETONE                                   | 0,01  |
| 2    | 6,6                | ISOVALERALDEHYDE                          | 0,01  |
| 3    | 6,8                | ETHANOL                                   | 0,01  |
| 4    | 7,4                | 3-METHYL-2-BUTENAL                        | 0,01  |
| 5    | 9,6                | $\alpha$ -PINENE                          | 0,08  |
| 6    | 9,8                | $\alpha$ -THUYENE                         | 0,01  |
| 7    | 9,9                | TOLUENE                                   | 0,01  |
| 8    | 10,4               | COMPOSÉ Mw=138                            | 0,01  |
| 9    | 10,6               | DIMETHYL METHYLETHYL CYCLOPENTENE ISOMERE | 0,17  |
| 10   | 10,7               | COMPOSÉ TERPENIQUE                        | 0,01  |
| 11   | 11,1               | DIMETHYL METHYLETHYL CYCLOPENTENE ISOMERE | 0,01  |
| 12   | 11,8               | MENTHENE ISOMERE                          | 0,01  |
| 13   | 12,9               | 2,5-DIMETHYL-1,6-HEPTADIENE               | 0,01  |
| 14   | 13,4               | $\beta$ -PINENE                           | 0,06  |
| 15   | 14,0               | SABINENE                                  | 0,02  |
| 16   | 16,1               | $\beta$ -MYRCENE                          | 0,05  |
| 17   | 18,4               | LIMONENE                                  | 0,08  |
| 18   | 19,0               | 1,8-CINEOLE                               | 0,31  |
| 19   | 20,4               | Cis- $\beta$ -OCIMENE                     | 0,01  |
| 20   | 21,3               | $\gamma$ -TERPINENE                       | 0,01  |
| 21   | 21,5               | Trans- $\beta$ -OCIMENE                   | 0,19  |
| 22   | 22,8               | p-CYMENE                                  | 0,02  |
| 23   | 24,1               | TERPINOLENE                               | 0,01  |
| 24   | 25,7               | ACETATE DE cis-3-HEXENYLE                 | 0,01  |
| 25   | 27,3               | 6-METHYL-5-HEPTEN-2-ONE                   | 0,11  |
| 26   | 30,1               | 3-HEXEN-1-OL                              | 0,02  |
| 27   | 31,5               | FENCHONE                                  | 0,01  |
| 28   | 34,3               | Cis-OXYDE DE LINALOL                      | 0,03  |
| 29   | 34,4               | 1-OCTEN-3-OL                              | 0,01  |
| 30   | 35,8               | DIHYDROMYRCENOL                           | 0,03  |
| 31   | 36,2               | MENTHONE                                  | 0,12  |
| 32   | 36,5               | ACETATE D'OCTYLE                          | 0,04  |
| 33   | 37,3               | ISOMENTHONE                               | 0,02  |
| 34   | 38,0               | $\alpha$ -COPAENE                         | 0,07  |
| 35   | 38,9               | DECANAL                                   | 0,02  |
| 36   | 39,8               | CAMPHRE                                   | 0,02  |
| 37   | 40,4               | $\beta$ -BOURBONENE                       | 0,03  |
| 38   | 40,6               | $\alpha$ -GURJUNENE                       | 0,01  |
| 39   | 41,1               | LINALOL                                   | 19,32 |
| 40   | 41,6               | 1-OCTANOL                                 | 0,08  |
| 41   | 41,9               | ALCOOL ALIPHATIQUE                        | 0,01  |
| 42   | 42,4               | ACETATE DE MENTHYLE                       | 0,03  |
| 43   | 42,8               | $\alpha$ ,cis-BERGAMOTENE                 | 0,01  |
| 44   | 43,9               | $\alpha$ -trans-BERGAMOTENE               | 0,64  |
| 45   | 44,3               | $\beta$ -ELEMENE                          | 0,06  |
| 46   | 44,6               | $\beta$ -CUBEBENE                         | 0,02  |
| 47   | 44,9               | TERPINENE-4-OL                            | 0,03  |

## Tableau de résultats 2 : BASILIC BIO

LOT N° OF22779

| Pics | Temps de rétention | Constituants    | %    |
|------|--------------------|-----------------|------|
| 48   | 45,0               | β-CARYOPHYLLENE | 0,55 |
| 49   | 47,2               | MENTHOL         | 0,44 |

Figure S2 (page 4/4) – Certificate of the chemical analysis for the lot number OF22779 of *Ocimum basilicum ssp basilicum* L. (basil) provided by Pranarôm. Screen capture made on 1st September 2020.

|    |       |                                      |              |
|----|-------|--------------------------------------|--------------|
| 54 | 49,7  | α-HUMULENE                           | 0,23         |
| 55 | 50,0  | NERAL                                | 0,51         |
| 56 | 50,4  | Z-β-FARNESENE                        | 0,01         |
| 57 | 50,7  | α-TERPINEOL                          | 0,16         |
| 58 | 51,9  | GERMACRENE D                         | 0,42         |
| 59 | 52,1  | SESQUITERPENE                        | 0,08         |
| 60 | 52,2  | α-ZINGIBERENE                        | 0,03         |
| 61 | 52,3  | β-SELINENE                           | 0,01         |
| 62 | 52,6  | β-BISABOLENE                         | 0,13         |
| 63 | 52,8  | SESQUITERPENE                        | 0,02         |
| 64 | 53,0  | GERANIAL                             | 0,61         |
| 65 | 53,1  | CARVONE                              | 0,05         |
| 66 | 53,3  | BICYCLOGERMACRENE                    | 0,08         |
| 67 | 54,3  | ACETATE DE GERANYLE                  | 0,01         |
| 68 | 54,5  | δ-CADINENE                           | 0,04         |
| 69 | 54,8  | γ-CADINENE                           | 0,01         |
| 71 | 55,3  | α-CURCUMENE                          | 0,03         |
| 72 | 55,4  | α-BISABOLENE                         | 1,91         |
| 73 | 56,5  | NEROL                                | 0,07         |
| 74 | 58,6  | Trans-ANETHOL                        | 0,02         |
| 75 | 59,1  | GERANIOL                             | 0,06         |
| 76 | 64,5  | 2,6-DIMETHYL, 3-7-OCTADIENE-2,6-DIOL | 0,02         |
| 77 | 67,9  | OXYDE DE CARYOPHYLLENE               | 0,03         |
| 78 | 68,4  | METHYLEUGENOL                        | 0,02         |
| 79 | 69,2  | ANISALDEHYDE                         | 0,01         |
| 80 | 69,8  | NEROLIDOL                            | 0,08         |
| 81 | 70,6  | Époxy-6,7-HUMULENE                   | 0,01         |
| 82 | 70,9  | COMPOSÉ AROMATIQUE                   | 0,01         |
| 83 | 74,7  | SPATHULENOL                          | 0,02         |
| 84 | 76,4  | EUGENOL                              | 0,09         |
| 85 | 78,0  | T-CADINOL                            | 0,01         |
| 86 | 78,4  | α-MUURLOL                            | 0,01         |
| 87 | 79,0  | α-BISABOLOL                          | 0,03         |
| 88 | 80,1  | α-CADINOL                            | 0,01         |
| 89 | 84,4  | CHAVICOL                             | 0,03         |
| 90 | 86,6  | COMPOSÉ AROMATIQUE Mw=220            | 0,01         |
| 91 | 95,3  | 3-METHOXY-CINNAMALDEHYDE             | 0,08         |
| 92 | 101,3 | COMPOSÉ AROMATIQUE Mw=164            | 0,05         |
|    |       | <b>TOTAL</b>                         | <b>99,97</b> |

Date de l'analyse – date of the analysis : Avril 2016,

Pranarôm Int.  
C. Schulze  
Contrôle qualité

**FICHE D'ANALYSE – ANALYSIS SHEET**  
**Huile essentielle – Essential oil**

Nom botanique – botanical name : **Matricaria recutita**  
 Nom commun – french name : **MATRICAIRE**  
 Numéro du lot – lot number : **OF22830**  
 Origine - origin : --- **PRANAROM - UK**  
 Partie de la plante – part of the plant : **FLEUR**  
 Date de distillation – distillation date : **06/2015**  
 Date de péremption – out of date : **04/2021**

**Caractéristiques d'analyse - analysis characteristics:**

CPG - SM HEWLETT PACKARD  
 Colonne : HP INNOWAX 60-0.5-0.25

Figure S3 (page 1/6) – Certificate of the chemical analysis for the lot number OF22830 of *Matricaria recutita* L. (German chamomile) provided by Pranarôm. Screen capture made on 1st September 2020.

|                                                |                              |
|------------------------------------------------|------------------------------|
| Aspect – physical state                        | Liquide limpide              |
| Couleur - colour                               | Bleu foncé                   |
| Odeur - odour                                  | Aromatique, tenace           |
| Densité à 20°C - density                       | 0,895                        |
| Densité à 15°C - density                       | 0,899                        |
| Indice de réfraction à 20°C – refractive index | 1,497 3 (lecture floue)      |
| Pouvoir rotatoire à 20°C - optical rotation    | Trop foncé pour la lecture   |
| Miscibilité à l'éthanol à 80% - miscibility    | Soluble dans l'alcool à 90 % |
| Point d'éclair : SETAFLASH - flashpoint        | 92,2 °C                      |

**Analyses pesticides – pesticide analysis :**

|                                                                                                                                                                                                                                                                                                                                                                                                                                                                                                                                                                                                                                                                                                                                                                                                                                                                                                                                                                                                                                                                                            |                                                                                        |
|--------------------------------------------------------------------------------------------------------------------------------------------------------------------------------------------------------------------------------------------------------------------------------------------------------------------------------------------------------------------------------------------------------------------------------------------------------------------------------------------------------------------------------------------------------------------------------------------------------------------------------------------------------------------------------------------------------------------------------------------------------------------------------------------------------------------------------------------------------------------------------------------------------------------------------------------------------------------------------------------------------------------------------------------------------------------------------------------|----------------------------------------------------------------------------------------|
| <p><b>Pesticides Organochlorés : Dosage par GC MS détecteur XSD (méthode multirésidus Interne validée selon la norme NF V03-110)</b><br/> <b>Liste des pesticides recherchés (Pharmacopée Européenne):</b> Aldchlor, Aldrine, Bromophos Ethyl, Bromophos Méthyl, Chlordane, Chlorfenvinphos, Chlorpyrifos, Chlorpyrifos Méthyl, Chlorthal Diméthyl, Cyfluthrine, Cynalothrine Iambda, Cyperméthrine, Dichlorfluamide, Dichlorvos, Dicofoi (Kethane), Dieldrine, Endosulfan, Endosulfan sulfate, Endrine, Fenchlorphos (Ronnei), Fenchlorphos-oxon, Fenvalerate, Fluralinate, Heptachlor, Heptachlor epoxide, Hexachlorobenzène, Hexachlorocyclohexane <math>\alpha</math>, Hexachlorocyclohexane <math>\beta</math>, Hexachlorocyclohexane <math>\gamma</math>, Hexachlorocyclohexane <math>\epsilon</math>, Lindane, Methoxychlor, Mirex, Naled, o,p'-DDD, o,p'-DDE, o,p'-DDT, Oxychlordane, p,p'-DDD, p,p'-DDE, p,p'-DDT, Pentachloroaniline, Pentachloroisole, Permethrine, Phosalone, Procymidone, Profenophos, Prothiofos, Quintozene, S421, Teconazene, Tetradifon, Vinolozoline</p> | <p><b>Résultats</b></p> <p>&lt; LMR*</p> <p>* Limite Maximale de Résidus autorisée</p> |
| <p><b>Pesticides Organophosphorés : Dosage par GC MS détecteur FPD (méthode multirésidus Interne validée selon la norme NF V03-110)</b><br/> <b>Liste des pesticides recherchés (Pharmacopée Européenne):</b> Acephate, Azinphos Ethyl, Azinphos Méthyl, Bromophos Ethyl, Bromophos Méthyl, Chlorfenvinphos, Chlorpyrifos, Chlorpyrifos Méthyl, Diazinon, Dichlorvos, Diméthoate, Ethion, Etrimpfos, Fenchlorphos (Ronnei), Fenchlorphos-oxon, Fentrothion, Fensulfothion (Dasanit), Fensulfothion-oxon, Fensulfothion-oxon-sulfone, Fensulfothion-sulfone, Fenthion, Fenthion-oxon, Fenthion-oxon-sulfone, Fenthion-oxon-sulfoxyde, Fenthion-sulfone, Fenthion-sulfoxyde, Fonofos, Malaoxon, Malathion, Mecarbam, Methacrifos, Methamidophos (Monitor), Méthidathion, Monocrotophos, Naled, Ométhoate, Paraoxon, Paraoxon Méthyl, Parathion Ethyl, Parathion Méthyl, Phosalone, Phosmet, Pirimiphos Ethyl, Pirimiphos Méthyl, Profenophos, Prothiofos, Quinalphos.</p>                                                                                                                    | <p><b>Résultats</b></p> <p>&lt; LMR*</p> <p>* Limite Maximale de Résidus autorisée</p> |

## Profil CHROMATOGRAPHIQUE

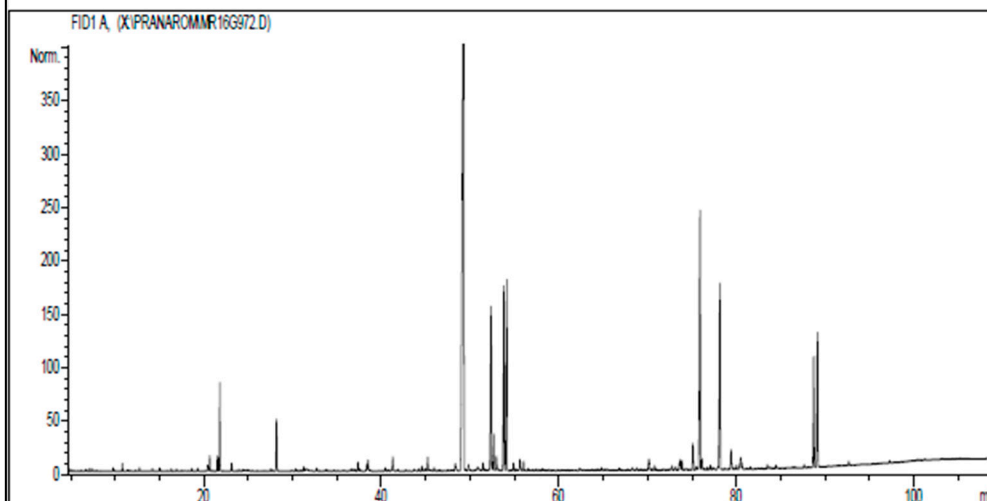

**Figure S3 (page 2/6)** – Certificate of the chemical analysis for the lot number OF22830 of *Matricaria recutita* L. (German chamomile) provided by Pranarôm. Screen capture made on 1st September 2020.

## Tableau de résultats 1 : CAMOMILLE MATRICIAIRE

LOT OF22830

| Pics | Temps de rétention | Constituants                  | %    |
|------|--------------------|-------------------------------|------|
| 1    | 4,9                | ACETONE                       | 0,02 |
| 2    | 6,2                | NONANE                        | 0,01 |
| 3    | 6,6                | 2-METHYL BUTANAL              | 0,01 |
| 4    | 6,7                | ISOVALERALDEHYDE              | 0,02 |
| 5    | 7,1                | ETHANOL                       | 0,03 |
| 6    | 7,5                | 2-METHYL BUTANAL              | 0,03 |
| 7    | 9,8                | α-PINENE                      | 0,06 |
| 8    | 9,9                | α-THUYENE                     | 0,01 |
| 9    | 10,8               | 2-METHYLBUTYRATE D'ETHYLE     | 0,12 |
| 10   | 11,3               | VALERATE D'ETHYLE             | 0,01 |
| 11   | 11,5               | CAMPHENE                      | 0,02 |
| 12   | 11,7               | ESTER ALIPHATIQUE             | 0,02 |
| 13   | 12,3               | HEXANAL                       | 0,01 |
| 14   | 12,7               | UNDECANE                      | 0,07 |
| 15   | 14,2               | SABINENE                      | 0,05 |
| 16   | 15,0               | METHYLPROPIONATE D'ISOBUTYLE  | 0,08 |
| 17   | 16,3               | β-MYRCENE                     | 0,04 |
| 18   | 16,9               | ψ-LIMONENE                    | 0,03 |
| 19   | 17,5               | α-TERPINENE                   | 0,01 |
| 20   | 18,7               | LIMONENE                      | 0,06 |
| 21   | 19,3               | 1,8-CINEOLE + β-PHELLANDRENE  | 0,07 |
| 22   | 20,4               | 2-PENTYL FURANE               | 0,12 |
| 23   | 20,5               | 2-METHYLBUTYRATE DE BUTYLE    | 0,04 |
| 24   | 20,7               | Cis-β-OCIMENE                 | 0,34 |
| 25   | 21,5               | γ-TERPINENE                   | 0,35 |
| 26   | 21,8               | Trans-β-OCIMENE               | 1,98 |
| 27   | 23,1               | p-CYMENE                      | 0,18 |
| 28   | 24,0               | TERPINOLENE                   | 0,04 |
| 29   | 24,4               | OCTANAL                       | 0,11 |
| 30   | 25,0               | ISOVALERATE D'ISOAMYLE        | 0,03 |
| 31   | 25,2               | 4,8-DIMETHYL-1,3,7-NONATRIENE | 0,02 |
| 32   | 27,5               | 6-METHYL-5-HEPTEN-2-ONE       | 0,06 |
| 33   | 28,2               | ARTEMISIA CETONE              | 1,25 |
| 34   | 30,3               | 3-HEXEN-1-OL                  | 0,06 |
| 35   | 30,8               | PROPIONATE D'HEXENYLE         | 0,02 |
| 36   | 31,0               | ANGELATE DE METHALLYLE        | 0,02 |
| 37   | 31,3               | YOMOGI ALCOOL                 | 0,11 |
| 38   | 31,6               | NONANAL                       | 0,18 |
| 39   | 32,7               | BUTYRATE D'HEXYLE             | 0,09 |
| 40   | 33,8               | 2-METHYLBUTYRATE D'HEXYLE     | 0,05 |
| 41   | 34,7               | 3-METHYLBUTYRATE D'HEXYLE     | 0,03 |
| 42   | 35,4               | ACETATE DIARTEMISIA ISOMERE   | 0,02 |

Figure S3 (page 3/6) – Certificate of the chemical analysis for the lot number OF22830 of *Matricaria recutita* L. (German chamomile) provided by Pranarôm. Screen capture made on 1st September 2020.

## Tableau de résultats 2 : CAMOMILLE MATRICIAIRE

LOT OF22830

| Pics | Temps de rétention | Constituants                           | %     |
|------|--------------------|----------------------------------------|-------|
| 46   | 37,0               | SESQUITERPENE                          | 0,05  |
| 47   | 37,4               | BICYCLOLEMENE                          | 0,25  |
| 48   | 37,6               | ISOVALERATE DE Cis-3-HEXENYLE          | 0,04  |
| 49   | 38,0               | CYCLOSATIVENE                          | 0,01  |
| 50   | 38,4               | $\alpha$ -COPAENE                      | 0,32  |
| 51   | 38,5               | ARTEMISIA ALCOOL                       | 0,17  |
| 52   | 40,4               | MODHEPHENE                             | 0,09  |
| 53   | 40,8               | $\alpha$ -GURJUNENE                    | 0,03  |
| 54   | 41,2               | $\alpha$ -ISOCOMENE                    | 0,49  |
| 55   | 41,3               | LINALOL                                | 0,04  |
| 56   | 41,6               | $\beta$ 1-CUBEBENE                     | 0,02  |
| 57   | 41,9               | 1-OCTANOL                              | 0,04  |
| 58   | 42,8               | CITRONNELLATE DE METHYLE               | 0,03  |
| 59   | 43,7               | $\epsilon$ -CADINENE                   | 0,07  |
| 60   | 44,2               | $\beta$ -ISOCOMENE                     | 0,07  |
| 61   | 44,6               | $\beta$ -ELEMENE                       | 0,14  |
| 62   | 44,9               | $\beta$ -CUBEBENE                      | 0,09  |
| 63   | 45,2               | $\beta$ -CARYOPHYLLENE                 | 0,44  |
| 64   | 45,5               | SESQUITERPENE                          | 0,05  |
| 65   | 46,0               | AROMADENDRENE                          | 0,11  |
| 66   | 46,4               | SESQUITERPENE                          | 0,02  |
| 67   | 46,6               | SESQUITERPENE                          | 0,04  |
| 68   | 47,4               | CADINA-3,5-DIENE                       | 0,01  |
| 69   | 47,6               | 4,8-DIMETHYL, 3,7-NONANEDIEN-2-ONE     | 0,03  |
| 70   | 48,1               | CADINENE ISOMERE                       | 0,06  |
| 71   | 48,3               | FARNESENE ISOMERE + ALLO-AROMADENDRENE | 0,33  |
| 72   | 49,3               | E(trans)- $\beta$ -FARNESENE           | 41,17 |
| 73   | 49,8               | $\alpha$ -HUMULENE                     | 0,24  |
| 74   | 50,0               | $\gamma$ -SELINENE                     | 0,02  |
| 75   | 50,7               | Z- $\beta$ -FARNESENE                  | 0,07  |
| 76   | 50,9               | $\gamma$ -CURCUMENE                    | 0,18  |
| 77   | 51,0               | BORNEOL                                | 0,06  |
| 78   | 51,5               | LEDENE                                 | 0,27  |
| 79   | 51,7               | SESQUITERPENE                          | 0,06  |
| 80   | 52,4               | GERMACRENE D                           | 5,46  |
| 81   | 52,6               | Z,E- $\alpha$ -FARNESENE               | 1,06  |
| 82   | 53,0               | $\beta$ -BISABOLENE                    | 0,49  |
| 83   | 53,8               | BICYCLOGERMACRENE                      | 5,89  |
| 84   | 54,1               | E,E- $\alpha$ -FARNESENE               | 5,57  |
| 85   | 54,6               | ACETATE DE GERANYLE                    | 0,05  |
| 86   | 54,9               | $\delta$ -CADINENE                     | 0,22  |
| 87   | 55,2               | $\gamma$ -CADINENE                     | 0,06  |
| 88   | 55,4               | SALICYLATE DE METHYLE                  | 0,20  |
| 89   | 55,6               | $\beta$ -SESQUIPELLANDRENE             | 0,28  |
| 90   | 56,0               | $\alpha$ -CURCUMENE                    | 0,20  |

Figure S3 (page 4/6) – Certificate of the chemical analysis for the lot number OF22830 of *Matricaria recutita* L. (German chamomile) provided by Pranarôm. Screen capture made on 1st September 2020.





Figure S3 (page 5/6) – Certificate of the chemical analysis for the lot number OF22830 of *Matricaria recutita* L. (German chamomile) provided by Pranarôm. Screen capture made on 1st September 2020.

**Tableau de résultats 3 : CAMOMILLE MATRICIAIRE**  
**LOT OF22830**

| Pics | Temps de rétention | Constituants                          | %    |
|------|--------------------|---------------------------------------|------|
| 91   | 56,5               | SESQUITERPENE Mw=202                  | 0,09 |
| 92   | 57,0               | CADINA-1,4-DIENE                      | 0,06 |
| 93   | 57,5               | NEROL                                 | 0,08 |
| 94   | 57,8               | $\alpha$ -AMORPHENE                   | 0,06 |
| 95   | 58,1               | SESQUITERPENE Mw=202                  | 0,08 |
| 96   | 58,9               | 2,4-DECADIENAL                        | 0,06 |
| 97   | 59,8               | CALAMENENE                            | 0,04 |
| 98   | 62,3               | SESQUIROSEFURANE                      | 0,07 |
| 99   | 62,5               | Epi-CUBEBOL                           | 0,05 |
| 100  | 62,8               | COMPOSÉ AROMATIQUE                    | 0,04 |
| 101  | 63,3               | $\alpha$ -CALACORENE                  | 0,02 |
| 102  | 63,8               | DIHYDROCHAMAZULENE ISOMERE            | 0,05 |
| 103  | 64,8               | PHENYLACETONITRILE                    | 0,04 |
| 104  | 64,4               | NONADECANE                            | 0,07 |
| 105  | 64,8               | DENDROLASINE                          | 0,10 |
| 106  | 65,1               | IONONE ISOMERE                        | 0,05 |
| 107  | 65,4               | Trans-JASMONE                         | 0,06 |
| 108  | 66,8               | COMPOSÉ AROMATIQUE                    | 0,06 |
| 109  | 67,1               | SESQUITERPENE                         | 0,02 |
| 110  | 67,8               | COMPOSÉ PHENOLIQUE                    | 0,04 |
| 111  | 68,3               | BOURBANANOL ISOMERE                   | 0,11 |
| 112  | 68,8               | ESTER ALIPHATIQUE                     | 0,08 |
| 113  | 69,3               | COMPOSÉ SESQUITERPENIQUE              | 0,02 |
| 114  | 69,6               | ESTER TERPENIQUE                      | 0,02 |
| 115  | 70,1               | Trans-NEROLIDOL + ALCOOL ALIPHATIQUE  | 0,51 |
| 116  | 70,5               | ACIDE CAPRYLIQUE                      | 0,06 |
| 117  | 70,8               | GLEENOL                               | 0,12 |
| 118  | 71,7               | Epi-CUBENOL                           | 0,04 |
| 119  | 71,9               | LEVOJUNENOL                           | 0,05 |
| 120  | 72,3               | SESQUIPELLANDROL ISOMERE              | 0,02 |
| 121  | 72,5               | CUBENOL                               | 0,04 |
| 122  | 72,8               | GLOBULOL                              | 0,12 |
| 123  | 73,2               | VIRIDIFLOROL                          | 0,12 |
| 124  | 73,6               | ALCOOL ALIPHATIQUE                    | 0,14 |
| 125  | 73,7               | SESQUITERPENOL                        | 0,26 |
| 126  | 73,9               | COMPOSÉ TERPENIQUE                    | 0,27 |
| 127  | 74,3               | EUDESMOL ISOMERE                      | 0,05 |
| 128  | 75,1               | SPATHULENOL + TRIMETHYL PENTADECANONE | 0,81 |
| 129  | 75,5               | OXYDE DE BISABOLOL C                  | 0,12 |
| 130  | 75,9               | OXYDE B DE $\alpha$ -BISABOLOL        | 8,77 |
| 131  | 76,2               | COMPOSÉ AROMATIQUE Mw=236             | 0,32 |
| 132  | 76,4               | DIHYDROCHAMAZULENE ISOMERE            | 0,05 |
| 133  | 76,8               | EUGENOL                               | 0,07 |
| 134  | 77,1               | OXYDE DE BISABOLOL ISOMERE            | 0,14 |
| 135  | 77,4               | T-CADINOL                             | 0,10 |

**Tableau de résultats 4 : CAMOMILLE MATRICARIA**  
**LOT OF22830**

| Pics | Temps de rétention | Constituants         | %    |
|------|--------------------|----------------------|------|
| 136  | 78,0               | OXYDE A DE BISABOLOL | 5,96 |

**Figure S3 (page 6/6)** – Certificate of the chemical analysis for the lot number OF22830 of *Matricaria recutita* L. (German chamomile) provided by Pranarôm. Screen capture made on 1st September 2020.

|     |       |                                                |              |
|-----|-------|------------------------------------------------|--------------|
| 141 | 80,4  | $\alpha$ -CADINOL + OXYDE DE BISABOLOL ISOMERE | 0,14         |
| 142 | 80,5  | $\alpha$ -EUDESMOL                             | 0,34         |
| 143 | 80,6  | SESQUITERPENOL                                 | 0,16         |
| 144 | 81,6  | ACIDE CAPRIQUE                                 | 0,05         |
| 145 | 83,5  | MATRICARIA ESTER                               | 0,13         |
| 146 | 84,4  | TRICOSANE                                      | 0,09         |
| 147 | 87,6  | COMPOSE AROMATIQUE Mw=234                      | 0,09         |
| 148 | 88,7  | CHAMAZULENE                                    | 3,45         |
| 149 | 89,1  | OXYDE A DE $\alpha$ -BISABOLOL                 | 4,02         |
| 150 | 92,6  | PENTACOSANE                                    | 0,13         |
| 151 | 97,2  | PHYTOL                                         | 0,06         |
| 152 | 100,4 | ACIDE MYRISTIQUE                               | 0,03         |
| 153 | 101,3 | HEPTACOSANE                                    | 0,03         |
|     |       | <b>TOTAL</b>                                   | <b>99,74</b> |

Date de l'analyse – date of the analysis : Avril 2016,

Pranarôm Int.  
 C. Schulze  
 Contrôle qualité

**FICHE D'ANALYSE – ANALYSIS SHEET**

**Huile essentielle – Essential oil**

Nom botanique – botanical name : *Cinnamomum cassia*  
 Nom commun – french name : CANNELIER DE CHINE  
 Numéro du lot – lot number : OF22426  
 Origine - origin : --- PRANARÔM - CHINE  
 Partie de la plante – part of the plant : RAMEAU  
 Date de distillation – distillation date : 06/2015  
 Date de péremption – out of date : 04/2021

**Caractéristiques d'analyse- analysis characteristics:**

CPG - SM HEWLETT PACKARD / CPG-FID

Figure S4 (page 1/4) – Certificate of the chemical analysis for the lot number OF22426 of *Cinnamomum cassia* (L.) J. Presl. (Chinese cinnamon) provided by Pranarôm. Screen capture made on 1st September 2020.

|                                                |                                      |
|------------------------------------------------|--------------------------------------|
| Aspect – physical state                        | Liquide limpide                      |
| Couleur - colour                               | Jaune clair                          |
| Odeur - odour                                  | Caractéristique, de cinnamaldehyde   |
| Densité à 20°C - density                       | 1,051                                |
| Densité à 15°C - density                       | 1,055                                |
| Indice de réfraction à 20°C - refractive index | 1,609 8                              |
| Pouvoir rotatoire à 20°C - optical rotation    | 0 °                                  |
| Miscibilité à l'éthanol à 70% - miscibility    | 1,9 volumes d'alcool / 1 volume d'HE |
| Point d'éclair : SETAF flash - flashpoint      | 113,1 °C                             |

**Analyses pesticides – pesticide analysis :**

|                                                                                                                                                                                                                                                                                                                                                                                                                                                                                                                                                                                                                                                                                                                                                                                                                                                                                                                                                                                                                                                                                               |                                                                                        |
|-----------------------------------------------------------------------------------------------------------------------------------------------------------------------------------------------------------------------------------------------------------------------------------------------------------------------------------------------------------------------------------------------------------------------------------------------------------------------------------------------------------------------------------------------------------------------------------------------------------------------------------------------------------------------------------------------------------------------------------------------------------------------------------------------------------------------------------------------------------------------------------------------------------------------------------------------------------------------------------------------------------------------------------------------------------------------------------------------|----------------------------------------------------------------------------------------|
| <p><b>Pesticides Organochlorés : Dosage par GC MS détecteur XSD (méthode multirésidus interne validée selon la norme NF V03-110)</b><br/> <b>Liste des pesticides recherchés (Pharmacopée Européenne):</b> Alachlor, Aldrine, Bromophos Ethyl, Bromophos Methyl, Chlordane, Chlorfenvinphos, Chlorpyrifos, Chlorpyrifos Methyl, Chlorthol Dimethyl, Cyfluthrine, Cyhalothrine lambda, Cyperméthrine, Dichlorofuoride, Dichlorvos, Dicofof (Kelthane), Dieldrine, Endosulfan, Endosulfan sulfate, Etrifrine, Fenchlorphos (Ronnel), Fenchlorphos-oxon, Fenvalerate, Fluralinate, Heptachlor, Heptachlor epoxide, Hexachlorobenzène, Hexachlorocyclohexane <math>\alpha</math>, Hexachlorocyclohexane <math>\beta</math>, Hexachlorocyclohexane <math>\delta</math>, Hexachlorocyclohexane <math>\epsilon</math>, Lindane, Methoxychlor, Mirex, Naled, o,p'-DDD, o,p'-DDE, o,p'-DDT, Oxychlordane, p,p'-DDD, p,p'-DDE, p,p'-DDT, Pentachloroaniline, Pentachloroisole, Permethrine, Phosalone, Procymidone, Profenophos, Prothiofos, Quintozene, S421, Tecnazene, Tetradifon, Vinidiazoline</p> | <p><b>Résultats</b></p> <p>&lt; LMR*</p> <p>* Limite Maximale de Résidus autorisée</p> |
| <p><b>Pesticides Organophosphorés : Dosage par GC MS détecteur FPD (méthode multirésidus interne validée selon la norme NF V03-110)</b><br/> <b>Liste des pesticides recherchés (Pharmacopée Européenne):</b> Acephate, Azinphos Ethyl, Azinphos Methyl, Bromophos Ethyl, Bromophos Methyl, Chlorfenvinphos, Chlorpyrifos, Chlorpyrifos Methyl, Diazinon, Dichlorvos, Diméthoate, Ethon, Etrifrine, Fenchlorphos (Ronnel), Fenchlorphos-oxon, Fenitrothion, Fensulfotlithion (Dasanit), Fensulfotlithion-oxon, Fensulfotlithion-oxon-sulfone, Fensulfotlithion-sulfone, Fenitron, Fenitron-oxon, Fenitron-oxon-sulfone, Fenitron-oxon-sulfoxyde, Fenitron-sulfone, Fenitron-sulfoxyde, Fonofos, Malaaxon, Malathion, Mecarbam, Methactfos, Methamidophos (Monitor), Methidathion, Monocrotophos, Naled, Omethoate, Paraaxon, Paraaxon Methyl, Parathion Ethyl, Parathion Methyl, Phosalone, Phosmet, Pirimiphos Ethyl, Pirimiphos Methyl, Profenophos, Prothiofos, Quinalphos.</p>                                                                                                            | <p><b>Résultats</b></p> <p>&lt; LMR*</p> <p>* Limite Maximale de Résidus autorisée</p> |

## Profil CHROMATOGRAPHIQUE

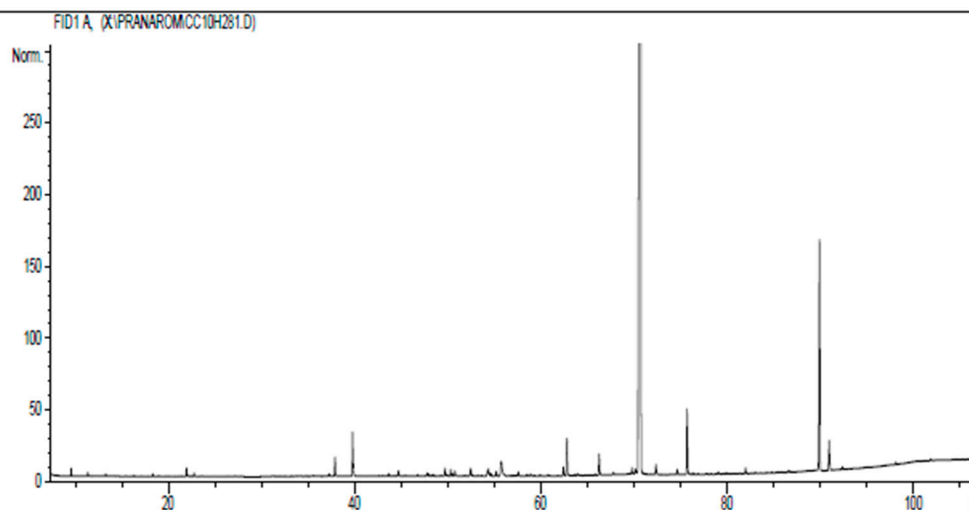

**Figure S4 (page 2/4)** – Certificate of the chemical analysis for the lot number OF22426 of *Cinnamomum cassia* (L.) J. Presl. (Chinese cinnamon) provided by Pranarôm. Screen capture made on 1st September 2020.

**Tableau de résultats 1 : CINNAMOMUM CASSIA**  
OF22426

| Pics | Temps de rétention | Constituants                        | %    |
|------|--------------------|-------------------------------------|------|
| 1    | 5,0                | ACETONE                             | 0,01 |
| 2    | 6,0                | METHANOL                            | 0,04 |
| 3    | 9,5                | $\alpha$ -PINENE                    | 0,09 |
| 4    | 11,3               | CAMPHENE                            | 0,06 |
| 5    | 13,2               | $\beta$ -PINENE                     | 0,04 |
| 6    | 16,3               | $\alpha$ -PHELLANDRENE              | 0,01 |
| 7    | 18,3               | LIMONENE                            | 0,04 |
| 8    | 18,9               | $\beta$ -PHELLANDRENE + 1,8-CINEOLE | 0,01 |
| 9    | 21,9               | STYRENE                             | 0,16 |
| 10   | 22,7               | p-CYMENE                            | 0,06 |
| 11   | 27,1               | 6-METHYL-5-HEPTEN-2-ONE             | 0,02 |
| 12   | 35,5               | FURFURALDEHYDE                      | 0,02 |
| 13   | 37,2               | YLANGENE                            | 0,06 |
| 14   | 37,8               | $\alpha$ -COPAENE                   | 0,41 |
| 15   | 39,7               | BENZALDEHYDE                        | 0,99 |
| 16   | 42,6               | $\alpha$ -cis-BERGAMOTENE           | 0,02 |
| 17   | 43,0               | SESQUITERPENE                       | 0,04 |
| 18   | 43,4               | ACETATE DE BORNYLE                  | 0,02 |
| 19   | 43,6               | $\alpha$ -trans-BERGAMOTENE         | 0,05 |
| 20   | 44,0               | $\beta$ -ELEMENE                    | 0,01 |
| 21   | 44,4               | TERPINENE-4-OL                      | 0,02 |
| 22   | 44,7               | $\beta$ -CARYOPHYLLENE              | 0,12 |
| 23   | 45,4               | AROMADENDRENE                       | 0,02 |
| 24   | 46,7               | p-METHOXY STYRENE                   | 0,03 |
| 25   | 47,7               | ACETOPHENONE                        | 0,06 |

**Figure S4 (page 3/4)** – Certificate of the chemical analysis for the lot number OF22426 of *Cinnamomum cassia* (L.) J. Presl. (Chinese cinnamon) provided by Pranarôm. Screen capture made on 1st September 2020.

|    |      |                                        |      |
|----|------|----------------------------------------|------|
| 31 | 49,8 | $\alpha$ -HUMULENE                     | 0,03 |
| 32 | 50,3 | $\gamma$ -MUUROLENE + BORNEOL          | 0,13 |
| 33 | 50,5 | LEDENE                                 | 0,04 |
| 34 | 50,7 | $\beta$ -BISABOLENE                    | 0,10 |
| 35 | 50,8 | HYDROXY CINNAMALDEHYDE                 | 0,02 |
| 36 | 52,4 | $\alpha$ -MUUROLENE                    | 0,22 |
| 37 | 52,6 | SESQUITERPENE                          | 0,01 |
| 38 | 54,2 | SESQUITERPENE                          | 0,09 |
| 39 | 54,3 | $\delta$ -CADINENE                     | 0,20 |
| 40 | 54,6 | FARNESENE ISOMERE                      | 0,06 |
| 41 | 55,2 | $\gamma$ -CADINENE                     | 0,09 |
| 42 | 55,7 | BENZENE PROPANAL + $\alpha$ -CURCUMENE | 0,71 |
| 43 | 56,6 | SESQUITERPENE                          | 0,02 |
| 44 | 57,4 | SESQUITERPENE                          | 0,02 |
| 45 | 57,5 | ACETATE DE 2-PHENYLETHYLE              | 0,07 |

**Tableau de résultats 2 : CINNAMOMUM CASSIA**  
OF22426

| Pics | Temps de rétention | Constituants                   | %     |
|------|--------------------|--------------------------------|-------|
| 46   | 58,4               | Trans-ANETHOL                  | 0,03  |
| 47   | 58,9               | CALAMENENE                     | 0,05  |
| 48   | 59,3               | 2-METHOXY PHENOL               | 0,01  |
| 49   | 59,9               | ALCOOL BENZYLIQUE              | 0,03  |
| 50   | 60,7               | COMPOSÉ CINNAMALDEHYDE         | 0,02  |
| 51   | 62,4               | Z-CINNAMALDEHYDE               | 0,19  |
| 52   | 62,7               | ALCOOL PHENYLETHYLIQUE         | 0,76  |
| 53   | 63,6               | $\alpha$ -CALACORENE           | 0,02  |
| 54   | 63,9               | TETRADECANAL                   | 0,04  |
| 55   | 65,7               | COMPOSÉ PHENOLIQUE             | 0,02  |
| 56   | 66,2               | 2-METHOXY-BENZALDEHYDE         | 0,46  |
| 57   | 67,7               | OXYDE DE CARYOPHYLLENE         | 0,05  |
| 58   | 69,7               | E-NEROLIDOL                    | 0,12  |
| 59   | 70,1               | 3-PHENYLPROPANOL               | 0,13  |
| 60   | 70,6               | E-CINNAMALDEHYDE               | 84,96 |
| 61   | 72,3               | COMPOSÉ PHENYLETHYLIQUE Mw=164 | 0,27  |
| 62   | 74,6               | SPATHULENOL                    | 0,11  |
| 63   | 75,0               | ACÉTATE DE CINNAMYLE           | 1,29  |
| 64   | 76,2               | EUGENOL                        | 0,03  |
| 65   | 76,4               | $\alpha$ -MUUROLOL             | 0,02  |
| 66   | 76,8               | EPOXY SESQUITERPENIQUE         | 0,02  |
| 67   | 77,6               | $\delta$ -CADINOL              | 0,02  |
| 68   | 77,8               | SESQUITERPENOL                 | 0,02  |
| 69   | 78,1               | EXPOXY SESQUITERPENIQUE        | 0,02  |
| 70   | 79,0               | DITERPENE Mw=272               | 0,05  |
| 71   | 79,5               | CADALENE                       | 0,02  |
| 72   | 79,6               | $\alpha$ -CADINOL              | 0,02  |
| 73   | 79,8               | SESQUITERPENOL                 | 0,02  |
| 74   | 80,0               | COMPOSÉ AROMATIQUE             | 0,02  |
| 75   | 81,3               | 2-METHOXY CINNAMALDEHYDE       | 0,01  |
| 76   | 81,9               | ALCOOL CINNAMIQUE              | 0,12  |

**Figure S4 (page 4/4)** – Certificate of the chemical analysis for the lot number OF22426 of *Cinnamomum cassia* (L.) J. Presl. (Chinese cinnamon) provided by Pranarôm. Screen capture made on 1st September 2020.

|    |       |                                   |              |
|----|-------|-----------------------------------|--------------|
| 82 | 90,9  | COUMARINE Mw=146                  | 0,75         |
| 83 | 92,3  | ACÉTATE D'o-METHOXYCINNAMALDEHYDE | 0,05         |
| 84 | 98,0  | BENZOATE DE BENZYLE               | 0,05         |
| 85 | 101,8 | BENZOATE DE 2-PHENYLETHYLE        | 0,04         |
| 86 | 107,8 | ACIDE CINNAMIQUE                  | 0,11         |
|    |       | <b>TOTAL</b>                      | <b>99,94</b> |

Date de l'analyse – date of the analysis : Mai 2016,

Pranarôm Int.  
C. Schulze  
Contrôle qualité



**FICHE D'ANALYSE – ANALYSIS SHEET**

Huile essentielle – Essential oil

Nom botanique – botanical name: *Coriandrum sativum*  
 Nom commun – french name: CORIANDRE  
 Numéro du lot – lot number : OF21374  
 Origine - origin: ---- PRANARÔM - UK  
 Partie de la plante – part of the plant: FEUILLE  
 Date de distillation – distillation date : 06/2014  
 Date de péremption – out of date : 12/2019

**Caractéristiques d'analyse – analysis characteristics:**

CPG - SM HEWLETT PACKARD / CPG-FID  
 Colonne : HP INNOWAX 60-0.5-0.25  
 Programmation de température : 6 mn à 50 °C -2 °C/mn → 250 °C-10mn à 250 °C  
 Gaz vecteur He : 22 psis

**Caractéristiques physiques – physical characteristics:**

|                                                |                                      |
|------------------------------------------------|--------------------------------------|
| Aspect – physical state                        | Liquide limpide                      |
| Couleur - colour                               | Jaune clair                          |
| Odeur - odour                                  | Caractéristique de la plante         |
| Densité à 20°C - density                       | 0,880                                |
| Densité à 15°C - density                       | 0,864                                |
| Indice de réfraction à 20°C - refractive index | 1,457 2                              |
| Pouvoir rotatoire à 20°C - optical rotation    | + 5 °                                |
| Miscibilité à l'éthanol à 75% - miscibility    | 1,3 volumes d'alcool / 1 volume d'HE |
| Point d'éclair : SETAFLASH - flashpoint        | 70,4 °C                              |

**Analyses pesticides – pesticide analysis :**

|                                                                                                                                                                                                                                                                                                                                                                                                                                                                                                                                                                                                                                                                                                                                                                                                                                                                                                                                                                                                                                                                            |                                                                                        |
|----------------------------------------------------------------------------------------------------------------------------------------------------------------------------------------------------------------------------------------------------------------------------------------------------------------------------------------------------------------------------------------------------------------------------------------------------------------------------------------------------------------------------------------------------------------------------------------------------------------------------------------------------------------------------------------------------------------------------------------------------------------------------------------------------------------------------------------------------------------------------------------------------------------------------------------------------------------------------------------------------------------------------------------------------------------------------|----------------------------------------------------------------------------------------|
| <p><b>Pesticides Organochlorés : Dosage par GC MS détecteur XSD (méthode multirésidus interne validée selon la norme NF V03-110)</b><br/> <b>Liste des pesticides recherchés (Pharmacopée Européenne):</b> Alachlor, Aldrine, Bromophos Ethyl, Bromophos Methyl, Chlordane, Chlorfenvinphos, Chlorpyrifos, Chlorpyrifos Methyl, Chlorthal Dimethyl, Cyfluthrine, Cynalothrine lambda, Cyperméthrine, Dichlorvos, Dicofol (Kelthane), Dieldrine, Endosulfan, Endosulfan sulfate, Endrine, Fenchlorphos (Ronnel), Fenchlorphos-oxon, Fenvalerate, Fluralinate, Heptachlor, Heptachlor epoxide, Hexachlorobenzène, Hexachlorocyclohexane <math>\alpha</math>, Hexachlorocyclohexane <math>\beta</math>, Hexachlorocyclohexane <math>\delta</math>, Hexachlorocyclohexane <math>\epsilon</math>, Lindane, Methoxychlore, Mirex, Naled, o,p'-DDD, o,p'-DDE, o,p'-DDT, Oxychlordane, p,p'-DDD, p,p'-DDE, p,p'-DDT, Pentachloroaniline, Pentachloroisole, Permethrine, Phosalone, Procymidone, Profenophos, Prothiofos, Quintozene, S421, Tecnazene, Tetradifon, Vinclozoline</p> | <p><b>Résultats</b></p> <p>&lt; LMR*</p> <p>* Limite Maximale de Résidus autorisée</p> |
|----------------------------------------------------------------------------------------------------------------------------------------------------------------------------------------------------------------------------------------------------------------------------------------------------------------------------------------------------------------------------------------------------------------------------------------------------------------------------------------------------------------------------------------------------------------------------------------------------------------------------------------------------------------------------------------------------------------------------------------------------------------------------------------------------------------------------------------------------------------------------------------------------------------------------------------------------------------------------------------------------------------------------------------------------------------------------|----------------------------------------------------------------------------------------|

Figure S5 (page 1/5) – Certificate of the chemical analysis for the lot number OF21374 of *Coriandrum sativum* L. (coriander) provided by Pranarôm. Screen capture made on 1st September 2020.

|                                                                                                                                                                                                                                                                                                                                                                         |                                               |
|-------------------------------------------------------------------------------------------------------------------------------------------------------------------------------------------------------------------------------------------------------------------------------------------------------------------------------------------------------------------------|-----------------------------------------------|
| <p>sulfone, Fenthion-oxon-sulfoxyde, Fenthion-sulfone, Fenthion-sulfoxyde, Fonofos, Malaoxon, Malathion, Mecarbam, Methacortos, Methamidophos (Monitor), Methidathion, Monocrotophos, Naled, Omethoate, Paraoxon, Paraoxon Methyl, Parathion Ethyl, Parathion Methyl, Phosalone, Phosmet, Pirimiphos Ethyl, Pirimiphos Methyl, Profenophos, Prothiofos, Quinalphos.</p> | <p>* Limite Maximale de Résidus autorisée</p> |
|-------------------------------------------------------------------------------------------------------------------------------------------------------------------------------------------------------------------------------------------------------------------------------------------------------------------------------------------------------------------------|-----------------------------------------------|

## Profil CHROMATOGRAPHIQUE

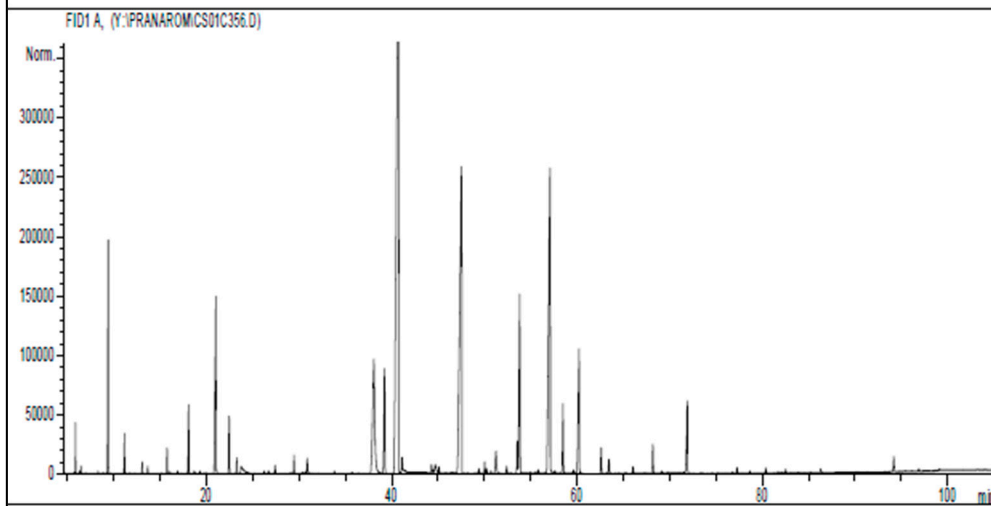

**Figure S5 (page 2/5)** – Certificate of the chemical analysis for the lot number OF21374 of *Coriandrum sativum* L. (coriander) provided by Pranarôm. Screen capture made on 1st September 2020.



## Tableau de résultats 1 : CORIANDRUM SATIVUM

OF21374

| Pics | Temps de rétention | Constituants                                        | %    |
|------|--------------------|-----------------------------------------------------|------|
| 1    | 4,6                | ACETONE                                             | 0,02 |
| 2    | 5,7                | METHANOL                                            | 0,01 |
| 3    | 5,8                | NONANE                                              | 0,39 |
| 4    | 6,2                | 2-METHYLBUTANAL                                     | 0,01 |
| 5    | 6,3                | ISOVALERALDEHYDE                                    | 0,03 |
| 6    | 6,4                | ETHANOL                                             | 0,07 |
| 7    | 6,8                | 1-NONENE                                            | 0,01 |
| 8    | 7,0                | 2-ETHYL FURANE                                      | 0,01 |
| 9    | 8,3                | DECANE                                              | 0,03 |
| 10   | 8,7                | 2-METHYLBUTYRATE DE METHYLE                         | 0,01 |
| 11   | 8,8                | TRICYCLENE                                          | 0,02 |
| 12   | 9,3                | $\alpha$ -PINENE                                    | 3,28 |
| 13   | 9,4                | $\alpha$ -THUYENE                                   | 0,01 |
| 14   | 11,1               | CAMPHENE                                            | 0,55 |
| 15   | 11,7               | HEXANAL                                             | 0,01 |
| 16   | 12,3               | UNDECANE                                            | 0,01 |
| 17   | 13,0               | $\beta$ -PINENE                                     | 0,17 |
| 18   | 13,6               | SABINENE                                            | 0,10 |
| 19   | 15,1               | $\Delta$ 3-CARENE                                   | 0,01 |
| 20   | 15,7               | $\beta$ -MYRCENE                                    | 0,36 |
| 21   | 16,0               | $\alpha$ -PHELLANDRENE                              | 0,03 |
| 22   | 16,9               | $\alpha$ -TERPINENE                                 | 0,04 |
| 23   | 17,2               | HEPTANAL                                            | 0,01 |
| 24   | 18,0               | LIMONENE                                            | 1,09 |
| 25   | 18,7               | $\beta$ -PHELLANDRENE                               | 0,04 |
| 26   | 18,8               | 1,8-CINEOLE                                         | 0,02 |
| 27   | 19,3               | 2-HEXANAL                                           | 0,04 |
| 28   | 19,7               | 2-PENTYLFURANE                                      | 0,01 |
| 29   | 20,0               | Cis- $\beta$ -OCIMENE                               | 0,01 |
| 30   | 21,0               | $\gamma$ -TERPINENE                                 | 4,14 |
| 31   | 21,1               | Trans- $\beta$ -OCIMENE                             | 0,05 |
| 32   | 22,4               | p-CYMENE                                            | 0,90 |
| 33   | 23,3               | TERPINOLENE                                         | 0,25 |
| 34   | 23,7               | OCTANAL                                             | 0,65 |
| 35   | 25,2               | ACETATE DE 4-HEXEN-1-OL                             | 0,01 |
| 36   | 26,2               | 2-HEXYLFURANE                                       | 0,04 |
| 37   | 26,6               | 6-METHYL-5-HEPTEN-2-ONE                             | 0,06 |
| 38   | 27,4               | 1-HEXANOL                                           | 0,14 |
| 39   | 29,1               | ANGELATE DE METHALLYLE                              | 0,02 |
| 40   | 29,4               | 3-HEXEN-1-OL                                        | 0,31 |
| 41   | 30,4               | 2-NONANONE                                          | 0,04 |
| 42   | 30,7               | NONANAL                                             | 0,05 |
| 43   | 30,9               | 2-HEXEN-1-OL                                        | 0,32 |
| 44   | 32,0               | PENTYL BENZENE                                      | 0,01 |
| 45   | 33,8               | $\alpha$ ,p-DIMETHYL STYRENE + Cis-OXYDE DE LINALOL | 0,04 |

Figure S5 (page 3/5) – Certificate of the chemical analysis for the lot number OF21374 of *Coriandrum sativum* L. (coriander) provided by Pranarôm. Screen capture made on 1st September 2020.



**Figure S5 (page 4/5)** – Certificate of the chemical analysis for the lot number OF21374 of *Coriandrum sativum* L. (coriander) provided by Pranarôm. Screen capture made on 1st September 2020.

**Tableau de résultats 2 : CORIANDRUM SATIVUM**  
OF21374

| Pics | Temps de rétention | Constituants                 | %     |
|------|--------------------|------------------------------|-------|
| 46   | 34,3               | 6-METHYL-5-HEPTEN-2-OL       | 0,01  |
| 47   | 35,1               | Trans-THUYANOL               | 0,01  |
| 48   | 35,7               | Trans-OXYDE DE LINALOL       | 0,03  |
| 49   | 35,8               | ACETATE D'OCTYLE             | 0,01  |
| 50   | 36,4               | CITRONELLAL                  | 0,03  |
| 51   | 38,1               | DECANAL                      | 6,43  |
| 52   | 39,2               | CAMPHRE                      | 2,40  |
| 53   | 40,7               | LINALOL                      | 32,42 |
| 54   | 41,0               | Cis-THUYANOL                 | 0,10  |
| 55   | 41,1               | 1-OCTANOL                    | 0,72  |
| 56   | 42,5               | PINOCARVONE                  | 0,07  |
| 57   | 44,3               | TERPINENE-4-OL               | 0,20  |
| 58   | 44,4               | β-CARYOPHYLLENE              | 0,07  |
| 59   | 44,7               | UNDECANAL                    | 0,42  |
| 60   | 45,1               | ALCOOL CYCLOALKYL            | 0,17  |
| 61   | 45,7               | Cis-p-MENTH-2-EN-1-OL        | 0,03  |
| 62   | 45,9               | BENZOATE DE METHYLE          | 0,03  |
| 63   | 46,3               | Cis-β-TERPINEOL              | 0,03  |
| 64   | 46,5               | MYRTENAL                     | 0,06  |
| 65   | 47,5               | 2-DECENAL                    | 15,09 |
| 66   | 47,6               | 1-NONANOL                    | 0,10  |
| 67   | 47,9               | ACETATE DE CITRONELLYLE      | 0,01  |
| 68   | 48,2               | ISOBORNEOL                   | 0,02  |
| 69   | 48,9               | δ-TERPINEOL                  | 0,01  |
| 70   | 49,1               | α-HUMULENE + LACTONE LAVANDE | 0,01  |
| 71   | 49,4               | NERAL + FORMIATE DE DECYLE   | 0,10  |
| 72   | 49,7               | ACETATE DE MYRTENYLE         | 0,01  |
| 73   | 50,0               | α-TERPINEOL                  | 0,19  |
| 74   | 50,2               | BORNEOL                      | 0,09  |
| 75   | 50,6               | FORMIATE DE GERANYLE         | 0,05  |
| 76   | 51,2               | DODECANAL                    | 0,67  |
| 77   | 51,3               | VERBENONE                    | 0,05  |
| 78   | 51,7               | ACETATE DE NERYLE            | 0,02  |
| 79   | 52,4               | GERANIAL                     | 0,14  |
| 80   | 52,6               | OXYDE DE LINALOL PYRANIQUE   | 0,02  |
| 81   | 52,8               | CARVONE                      | 0,03  |
| 82   | 53,5               | ACETATE DE GERANYLE          | 0,55  |
| 83   | 53,8               | 1-DECANOL + 2-UNDECENAL      | 4,27  |
| 84   | 54,1               | CITRONELLOL                  | 0,03  |
| 85   | 54,4               | SESQUITERPENE                | 0,02  |
| 86   | 54,6               | PROPIONATE DE NERYLE         | 0,02  |
| 87   | 55,0               | SALICYLATE DE METHYLE        | 0,05  |
| 88   | 55,5               | MYRTENOL                     | 0,04  |
| 89   | 55,8               | NEROL                        | 0,07  |
| 90   | 57,1               | 2-DECEN-1-OL                 | 12,35 |

**Figure S5 (page 5/5)** – Certificate of the chemical analysis for the lot number OF21374 of *Coriandrum sativum* L. (coriander) provided by Pranarôm. Screen capture made on 1st September 2020.

**Tableau de résultats 3 : CORIANDRUM SATIVUM**  
OF21374

| Pics | Temps de rétention | Constituants                        | %            |
|------|--------------------|-------------------------------------|--------------|
| 91   | 58,2               | ALCOOL ALIPHATIQUE                  | 0,06         |
| 92   | 57,6               | ALDEHYDE TERPENIQUE                 | 0,05         |
| 93   | 58,0               | Trans-CARVEOL                       | 0,01         |
| 94   | 58,4               | GERANIOL                            | 1,24         |
| 95   | 58,5               | p-CYMENE-8-OL                       | 0,02         |
| 96   | 59,6               | ALCOOL ALIPHATIQUE                  | 0,07         |
| 97   | 60,2               | 2-DODECENAL                         | 3,54         |
| 98   | 60,4               | DODECADIENAL                        | 0,03         |
| 99   | 62,6               | 2-DODECEN-1-OL                      | 0,45         |
| 100  | 63,4               | PENTADECANAL                        | 0,30         |
| 101  | 63,5               | 2,6-DIMETHYL-3,7-OCTADIENE-2,6-DIOL | 0,03         |
| 102  | 65,2               | 1-DODECANOL                         | 0,02         |
| 103  | 66,0               | 2-TRIDECENAL                        | 0,13         |
| 104  | 67,3               | OXYDE DE CARYOPHYLLENE              | 0,01         |
| 105  | 68,2               | Trans-2-TETRADECEN-1-OL             | 0,50         |
| 106  | 69,1               | Cis-NEROLIDOL                       | 0,06         |
| 107  | 69,8               | ACIDE CAPRYLIQUE                    | 0,02         |
| 108  | 71,9               | TETRADECENAL                        | 1,81         |
| 109  | 77,3               | ALDEHYDE ALIPHATIQUE INSATURÉ       | 0,10         |
| 110  | 78,6               | ALDEHYDE ALIPHATIQUE                | 0,04         |
| 111  | 80,4               | ACIDE CAPRIQUE                      | 0,10         |
| 112  | 81,7               | COMPOSÉ PHENYLIQUE Mw=238           | 0,02         |
| 113  | 82,5               | ALDEHYDE ALIPHATIQUE INSATURÉ       | 0,08         |
| 114  | 86,3               | ACIDE trans-2-DECENOÏQUE            | 0,07         |
| 115  | 94,2               | SEDANOLIDE Mw=194                   | 0,32         |
| 116  | 96,9               | COMPOSÉ AROMATIQUE                  | 0,04         |
| 117  | 99,1               | ACIDE MYRISTIQUE                    | 0,04         |
|      |                    | <b>TOTAL</b>                        | <b>99,84</b> |

Date de l'analyse – date of the analysis : Janvier 2015,

Pranarôm Int.  
C. Schulze  
Contrôle qualité

Figure S6 (page 1/4) – Certificate of the chemical analysis for the lot number OF22293 of *Eugenia caryophyllus* (Spreng.) Bullock & S. G. Harrison. (clove) provided by Pranarôm. Screen capture made on 1st September 2020.

## **FICHE D'ANALYSE – ANALYSIS SHEET**

### Huile essentielle – Essential oil

Nom botanique – botanical name: *Eugenia caryophyllus*  
 Nom commun – french name: CLOUS DE GIROFLE  
 Numéro du lot – lot number : OF22293  
 Origine - origin : -- PRANARÔM - INDONESIE  
 Partie de la plante – part of the plant: BOUTON FLORAL  
 Date de distillation – distillation date : 06/2015  
 Date de péremption – out of date : 04/2021

#### Caractéristiques d'analyse – analysis characteristics:

CPG - SM HEWLETT PACKARD / CPG - FID  
 Colonne : HP INNOWAX 60-0.5-0.25  
 Programmation de température : 6 mm à 50°C -2°C/mm→250°C-20mn à 250°C  
 Gaz vecteur He : 22 psis

#### Caractéristiques physiques – physical characteristics :

|                                                |                                   |
|------------------------------------------------|-----------------------------------|
| Aspect – physical state                        | Liquide limpide                   |
| Couleur - colour                               | Jaune d'or clair                  |
| Odeur - odour                                  | Caractéristique de l'eugénol      |
| Densité à 20°C - density                       | 1,055                             |
| Densité à 15°C - density                       | 1,059                             |
| Indice de réfraction à 20°C - refractive index | 1,534 8                           |
| Pouvoir rotatoire à 20°C - optical rotation    | - 0,5 °                           |
| Miscibilité à l'éthanol à 70% - miscibility    | 1 volume d'alcool / 1 volume d'HE |
| Point d'éclair : SETAFLASH - flashpoint        | 103,3 °C                          |

#### Analyses pesticides – pesticide analysis :

|                                                                                                                                                                                                                                                                                                                                                                                                                                                                                                                                                                                                                                                                                                                                                                                                                                                                                                                                                                                                                                        |                                                                              |
|----------------------------------------------------------------------------------------------------------------------------------------------------------------------------------------------------------------------------------------------------------------------------------------------------------------------------------------------------------------------------------------------------------------------------------------------------------------------------------------------------------------------------------------------------------------------------------------------------------------------------------------------------------------------------------------------------------------------------------------------------------------------------------------------------------------------------------------------------------------------------------------------------------------------------------------------------------------------------------------------------------------------------------------|------------------------------------------------------------------------------|
| <b>Pesticides Organochlorés : Dosage par GC MS détecteur XSD (méthode multirésidus interne validée selon la norme NF V03-110)</b><br><b>Liste des pesticides recherchés (Pharmacopée Européenne):</b> Alachlor, Aldrine, Bromophos Ethyl, Bromophos Methyl, Chlordane, Chlorfenvinphos, Chlorpyrifos, Chlorpyrifos Methyl, Chlorthal Dimethyl, Cyfluthrine, Cyhalothrine lambda, Cypemethrine, Dichlofuanide, Dichlorvos, Dicofof (Kelthane), Dieldrine, Endosulfan, Endosulfan sulfate, Endrine, Fenchlorphos (Ronnel), Fenchlorphos-oxon, Fenvalerate, Fluvainate, Heptachlor, Heptachlor epoxide, Hexachlorobenzène, Hexachlorocyclohexane $\alpha$ , Hexachlorocyclohexane $\beta$ , Hexachlorocyclohexane $\delta$ , Hexachlorocyclohexane $\epsilon$ , Lindane, Methoxychlor, Mixex, Naled, o,p'-DDD, o,p'-DDE, o,p'-DDT, Oxychlorane, p,p'-DDD, p,p'-DDE, p,p'-DDT, Pentachloroaniline, Pentachloroanisole, Permethrine, Phosalone, Procymidone, Profenophos, Prothiofos, Quintozene, S421, Tecnazene, Tetradifon, Vinclozoline | <b>Résultats</b><br><br>< LMR*<br><br>* Limite Maximale de Résidus autorisée |
| <b>Pesticides Organophosphorés : Dosage par GC MS détecteur FPD (méthode multirésidus interne validée selon la norme NF V03-110)</b><br><b>Liste des pesticides recherchés (Pharmacopée Européenne):</b> Acephate, Azinphos Ethyl, Azinphos Methyl, Bromophos Ethyl, Bromophos Methyl, Chlorfenvinphos, Chlorpyrifos, Chlorpyrifos Methyl, Diazinon, Dichlorvos, Diméthoate, Ethion, Etriphos, Fenchlorphos (Ronnel), Fenchlorphos-oxon, Fenitrothion, Fensulfothion (Dasanit), Fensulfothion-oxon, Fensulfothion-oxon-sulfone, Fensulfothion-sulfone, Fenthion, Fenthion-oxon, Fenthion-oxon-sulfone, Fenthion-oxon-sulfoxyde, Fenthion-sulfone, Fenthion-sulfoxyde, Fonofos, Malaoxon, Malathion, Mecarbam, Methacrifos, Methamidophos (Monitor), Methidathion, Monocrotophos, Naled, Ométhoate, Paraoxon, Paraoxon Methyl, Parathion Ethyl, Parathion Methyl, Phosalone, Phosmet, Pirimiphos Ethyl, Pirimiphos Methyl, Profenophos, Prothiofos, Quinalphos.                                                                         | <b>Résultats</b><br><br>< LMR*<br><br>* Limite Maximale de Résidus autorisée |

## Profil CHROMATOGRAPHIQUE

FID1A, (Y:\PRANAROME\29H261.D)

**Figure S6 (page 2/4)** – Certificate of the chemical analysis for the lot number OF22293 of *Eugenia caryophyllus* (Spreng.) Bullock & S. G. Harrison. (clove) provided by Pranarôm. Screen capture made on 1st September 2020.

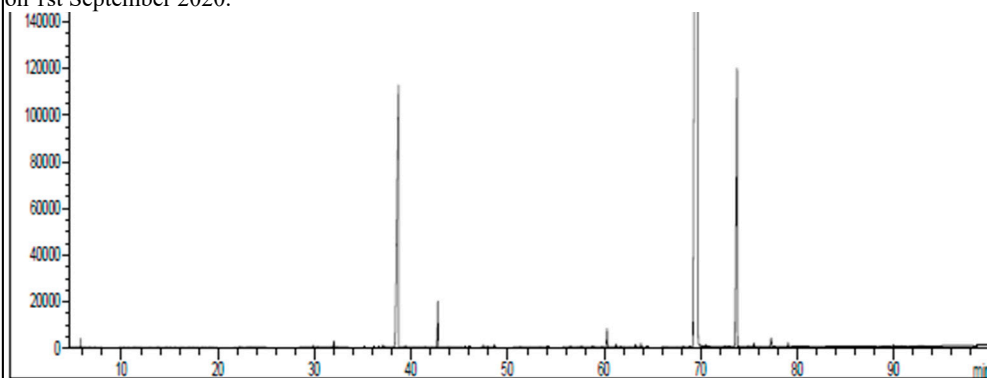

**Tableau de résultats 1: EUGENIA CARYOPHYLLUS**  
OF22293

| Pics | Temps de rétention | Constituants            | %    |
|------|--------------------|-------------------------|------|
| 1    | 5,8                | ETHANOL                 | 0,05 |
| 2    | 22,2               | 6-METHYL-5-HEPTEN-2-ONE | 0,01 |
| 3    | 29,9               | FURFURAL                | 0,02 |

**Figure S6 (page 3/4)** – Certificate of the chemical analysis for the lot number OF22293 of *Eugenia caryophyllus* (Spreng.) Bullock & S. G. Harrison. (clove) provided by Pranarôm. Screen capture made on 1st September 2020.

|    |      |                          |       |
|----|------|--------------------------|-------|
| 9  | 37,1 | ISOCARYOPHYLLENE ISOMERE | 0,04  |
| 10 | 38,2 | β-ELEMENE                | 0,01  |
| 11 | 38,7 | β-CARYOPHYLLENE          | 9,06  |
| 12 | 39,4 | SESQUITERPENE            | 0,02  |
| 13 | 40,5 | CADINA-1,5-DIENE         | 0,01  |
| 14 | 41,5 | SESQUITERPENE            | 0,01  |
| 15 | 42,8 | α-HUMULENE               | 0,70  |
| 16 | 43,9 | γ-MUUROLENE              | 0,01  |
| 17 | 45,6 | FARNESENE ISOMERE        | 0,01  |
| 18 | 46,0 | α-MUUROLENE              | 0,01  |
| 19 | 46,2 | β-SELINENE               | 0,01  |
| 20 | 47,5 | α-FARNESENE              | 0,03  |
| 21 | 47,9 | δ-CADINENE               | 0,01  |
| 22 | 48,0 | γ-CADINENE               | 0,01  |
| 23 | 48,6 | SALICYLATE DE METHYLE    | 0,03  |
| 24 | 51,3 | EPOXYDE SESQUITERPENIQUE | 0,02  |
| 25 | 54,2 | ALCOOL BENZYLIQUE        | 0,01  |
| 26 | 56,6 | α-CALACORENE             | 0,03  |
| 27 | 57,7 | CETONE AROMATIQUE Mw=164 | 0,03  |
| 28 | 58,8 | EPOXYDE SESQUITERPENIQUE | 0,02  |
| 29 | 59,0 | EPOXYDE SESQUITERPENIQUE | 0,01  |
| 30 | 59,8 | OXYDE D'ISOCARYOPHYLLENE | 0,02  |
| 31 | 60,3 | OXYDE DE CARYOPHYLLENE   | 0,31  |
| 32 | 61,2 | EPOXYDE SESQUITERPENIQUE | 0,05  |
| 33 | 61,7 | METHYLEUGENOL            | 0,02  |
| 34 | 62,0 | EPOXYDE SESQUITERPENIQUE | 0,01  |
| 35 | 63,2 | EPOXY-6,7-HUMULENE       | 0,05  |
| 36 | 63,8 | CARYOPHYLLENOL           | 0,06  |
| 37 | 66,1 | METHOXY PROPYL PHENOL    | 0,01  |
| 38 | 66,5 | COMPOSÉ AROMATIQUE       | 0,01  |
| 39 | 68,2 | COMPOSÉ OXYGÉNE          | 0,02  |
| 40 | 68,9 | EPOXYDE SESQUITERPENIQUE | 0,02  |
| 41 | 69,7 | EUGENOL                  | 82,30 |
| 42 | 70,5 | SESQUITERPENOL           | 0,02  |
| 43 | 72,6 | COMPOSÉ PHENOLIQUE       | 0,01  |
| 44 | 73,8 | ACETATE D'EUGENYLE       | 6,40  |
| 45 | 73,9 | COMPOSE Mw=206           | 0,01  |



**Tableau de résultats 2 : EUGENIA CARYOPHYLLUS**  
OF22293

| Pics | Temps de rétention | Constituants              | %            |
|------|--------------------|---------------------------|--------------|
| 46   | 74,9               | SESQUITERPENOL            | 0,02         |
| 47   | 75,5               | CARYOPHYLLA-3,7-DIEN-6-OL | 0,06         |
| 48   | 77,2               | CHAVICOL                  | 0,10         |
| 49   | 77,3               | EPOXYDE SESQUITERPENIQUE  | 0,09         |
| 50   | 77,6               | ISOEUGENOL                | 0,01         |
| 51   | 77,7               | EPOXYDE SESQUITERPENIQUE  | 0,01         |
| 52   | 79,0               | SESQUITERPENOL            | 0,06         |
| 53   | 87,0               | VANILLINE                 | 0,01         |
| 54   | 89,9               | BENZOATE DE BENZYLE       | 0,02         |
|      |                    | <b>TOTAL</b>              | <b>99,99</b> |

**Figure S6 (page 4/4)** – Certificate of the chemical analysis for the lot number OF22293 of *Eugenia caryophyllus* (Spreng.) Bullock & S. G. Harrison. (clove) provided by Pranarôm. Screen capture made on 1st September 2020.



## FICHE D'ANALYSE – ANALYSIS SHEET

### Huile essentielle – Essential oil

Nom botanique – botanical name : *Cymbopogon citratus*  
 Nom commun – french name : LEMONGRASS  
 Numéro du lot – lot number : OF20407  
 Origine - origin: ----- PRANAROM - GUATEMALA  
 Partie de la plante – part of the plant : PARTIE AÉRIENNE  
 Date de distillation – distillation date : 06/2014  
 Date de péremption – out of date : 05/2020

#### Caractéristiques d'analyse - analysis characteristics:

CPG - SM HEWLETT PACKARD  
 Colonne : HP INNOWAX 60-0.5-0.25  
 Programmation de température : 6 mn à 50°C -2°C/mn→250°C-10mn à 250°C

Figure S7 (page 1/5) – Certificate of the chemical analysis for the lot number OF20407 of *Cymbopogon citratus* (DC.) Staph. (lemongrass) provided by Pranarôm. Screen capture made on 1st September 2020.

| Color - couleur                                | Jaune clair                         |
|------------------------------------------------|-------------------------------------|
| Odeur - odour                                  | Citronnée caractéristique           |
| Densité à 20°C - density                       | 0,898                               |
| Densité à 15°C - density                       | 0,900                               |
| Indice de réfraction à 20°C - refractive index | - 0,5 °                             |
| Pouvoir rotatoire à 20°C – optical rotation    | 1,484 4                             |
| Miscibilité à l'éthanol à 75% - miscibility    | 1,2 volumes d'alcool/ 1 volume d'HE |
| Point d'éclair : SETAFLASH – flashpoint        | 85,6                                |

#### Analyses pesticides – pesticide analysis :

|                                                                                                                                                                                                                                                                                                                                                                                                                                                                                                                                                                                                                                                                                                                                                                                                                                                                                                                                                                                                                                   |                                                                                                       |
|-----------------------------------------------------------------------------------------------------------------------------------------------------------------------------------------------------------------------------------------------------------------------------------------------------------------------------------------------------------------------------------------------------------------------------------------------------------------------------------------------------------------------------------------------------------------------------------------------------------------------------------------------------------------------------------------------------------------------------------------------------------------------------------------------------------------------------------------------------------------------------------------------------------------------------------------------------------------------------------------------------------------------------------|-------------------------------------------------------------------------------------------------------|
| <b>Pesticides Organochlorés : Dosage par GC MS détecteur XSD (méthode multirésidus interne validée selon la norme NF V03-110)</b><br><b>Liste des pesticides recherchés (Pharmacopée Européenne):</b> Alachlor, Aldrine, Bromophos Ethyl, Bromophos Méthyl, Chlorfenvinphos, Chlorpyrifos, Chlorpyrifos Méthyl, Chlorthal Diméthyl, Cyfluthrine, Cyhalothrine lambda, Cyperméthrine, Dichlorofuamide, Dichlorvos, Dicofof (Kelthane), Dieldrine, Endosulfan, Endosulfan sulfate, Endrine, Fenchlorphos (Ronnel), Fenchlorphos-oxon, Fenvalerate, Fluvalinate, Heptachlor, Heptachlor epoxide, Hexachlorobenzène, Hexachlorocyclohexane $\alpha$ , Hexachlorocyclohexane $\beta$ , Hexachlorocyclohexane $\delta$ , Hexachlorocyclohexane $\epsilon$ , Lindane, Methoxychlor, Mixak, Naled, o,p'-DDD, o,p'-DDE, o,p'-DDT, Orychlorthane, p,p'-DDD, p,p'-DDE, p,p'-DDT, Pentachloroaniline, Pentachloroanisole, Permethrine, Phosalone, Procyimdone, Profenophos, Prothiofos, Quintozène, S421, Tecnazène, Tetradifon, Vinclizoline | <b>Résultats</b><br><br><b>&lt; LMR*</b><br><br><small>* Limite Maximale de Résidus autorisée</small> |
| <b>Pesticides Organophosphorés : Dosage par GC MS détecteur FPD (méthode multirésidus interne validée selon la norme NF V03-110)</b><br><b>Liste des pesticides recherchés (Pharmacopée Européenne):</b> Acephate, Azinphos Ethyl, Azinphos Méthyl, Bromophos Ethyl, Bromophos Méthyl, Chlorfenvinphos, Chlorpyrifos, Chlorpyrifos Méthyl, Diazinon, Dichlorvos, Diméthoate, Ethion, Etrimphos, Fenchlorphos (Ronnel), Fenchlorphos-oxon, Fenitrothion, Fensulfothion (Dasanit), Fensulfothion-oxon, Fensulfothion-oxon-sulfone, Fensulfothion-sulfone, Fenthion, Fenthion-oxon, Fenthion-oxon-sulfone, Fenthion-oxon-sulfoxyde, Fenthion-sulfone, Fenthion-sulfoxyde, Fonofos, Malaoxon, Malathion, Mecarbam, Methacrofos, Methamidophos (Monitor), Methidathion, Monocrotophos, Naled, Ométhoate, Paraoxon, Paraoxon Méthyl, Parathion Ethyl, Parathion Méthyl, Phosalone, Phosmet, Pirimiphos Ethyl, Pirimiphos Méthyl, Profenophos, Prothiofos, Quinalphos.                                                                   | <b>Résultats</b><br><br><b>&lt; LMR*</b><br><br><small>* Limite Maximale de Résidus autorisée</small> |

## Profil CHROMATOGRAPHIQUE

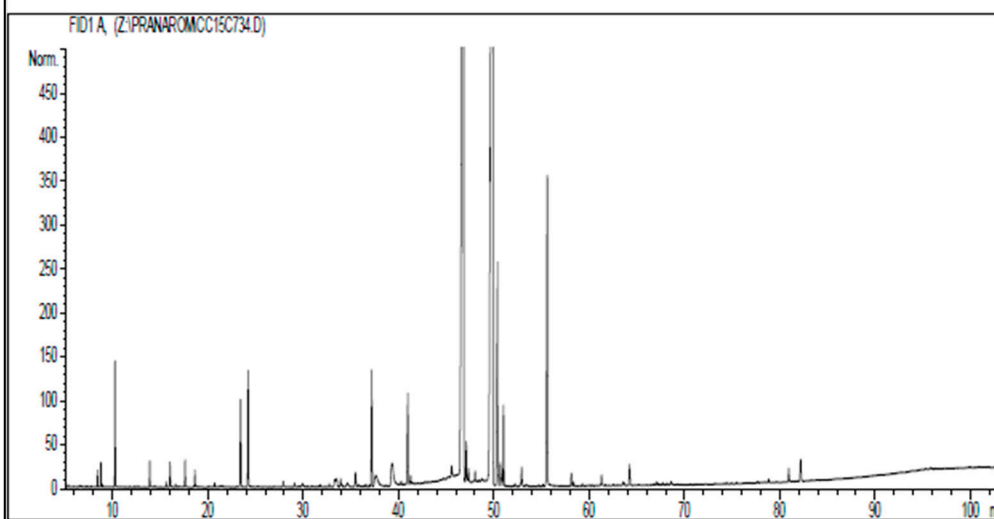

**Figure S7 (page 2/5)** – Certificate of the chemical analysis for the lot number OF20407 of *Cymbopogon citratus* (DC.) Stapf. (lemongrass) provided by Pranarôm. Screen capture made on 1st September 2020.

## Tableau de résultats 1 : CYMBOPOGON CITRATUS

LOT N° OF20407

| Pics | Temps de rétention | Constituants                     | %    |
|------|--------------------|----------------------------------|------|
| 1    | 4,7                | ACETONE                          | 0,02 |
| 2    | 5,4                | ACETATE D'ETHYLE                 | 0,01 |
| 3    | 6,1                | ISOVALERALDEHYDE                 | 0,01 |
| 4    | 6,2                | ETHANOL                          | 0,01 |
| 5    | 7,7                | 3,3,5-TRIMETHYL-1,4-HEXADIENE    | 0,01 |
| 6    | 8,4                | TRICYCLENE                       | 0,14 |
| 7    | 8,8                | $\alpha$ -PINENE                 | 0,22 |
| 8    | 8,9                | $\alpha$ -THUYENE                | 0,03 |
| 9    | 9,1                | 2,6-DIMETHYL-2,4-HEPTADIENE      | 0,01 |
| 10   | 10,5               | CAMPHENE                         | 1,17 |
| 11   | 11,0               | HEXANAL                          | 0,01 |
| 12   | 12,3               | $\beta$ -PINENE                  | 0,01 |
| 13   | 12,8               | SABINENE                         | 0,01 |
| 14   | 13,0               | 4-HEPTANONE                      | 0,02 |
| 15   | 14,3               | $\Delta$ 3-CARENE                | 0,01 |
| 16   | 14,8               | $\beta$ -MYRCENE                 | 0,10 |
| 17   | 15,1               | $\alpha$ -PHELLANDRENE           | 0,01 |
| 18   | 15,9               | $\alpha$ -TERPINENE + HEPTANAL   | 0,01 |
| 19   | 16,6               | 2,3-DEHYDRO-1,8-CINEOLE          | 0,04 |
| 20   | 16,9               | ALCOOL ISOAMYLIQUE               | 0,04 |
| 21   | 17,1               | LIMONENE                         | 1,84 |
| 22   | 16,6               | $\beta$ -PHELLANDRENE            | 0,03 |
| 23   | 17,7               | 1,8-CINEOLE                      | 0,01 |
| 24   | 17,9               | MENTHATRIENE ISOMERE + 2-HEXENAL | 0,01 |
| 25   | 18,9               | Cis- $\beta$ -OCIMENE            | 0,30 |
| 26   | 19,8               | $\gamma$ -TERPINENE              | 0,01 |
| 27   | 20,0               | Trans- $\beta$ -OCIMENE          | 0,19 |
| 28   | 21,2               | p-CYMENE                         | 0,01 |

Figure S7 (page 3/5) – Certificate of the chemical analysis for the lot number OF20407 of *Cymbopogon citratus* (DC.) Stapf. (lemongrass) provided by Pranarôm. Screen capture made on 1st September 2020.

|    |      |                              |      |
|----|------|------------------------------|------|
| 34 | 25,5 | 6-METHYL-5-HEPTEN-2-ONE      | 1,05 |
| 35 | 25,6 | Trans-3-HEXEN-1-OL           | 0,03 |
| 36 | 26,1 | 1-HEXANOL                    | 0,01 |
| 37 | 26,7 | Cis-OXYDE DE ROSE            | 0,01 |
| 38 | 26,7 | NONANAL                      | 0,02 |
| 39 | 27,9 | ALLO-OCIMENE                 | 0,01 |
| 40 | 28,1 | Cis-3-HEXEN-1-OL             | 0,01 |
| 41 | 29,4 | TRIMETHYL ANISALDEHYDE       | 0,11 |
| 42 | 30,6 | PERILLENE                    | 0,06 |
| 43 | 30,8 | ALDEHYDE FURANIQUE           | 0,01 |
| 44 | 31,1 | ACETATE DE 7-METHYL-4-OCTYLE | 0,03 |
| 45 | 31,3 | Epi-PHOTOCITRAL ISOMERE      | 0,13 |
| 46 | 31,9 | ALDEHYDE TERPENIQUE          | 0,02 |

## Tableau de résultats 2 : CYMBOPOGON CITRATUS

LOT N° OF20407

| Pics | Temps de rétention | Constituants                            | %    |
|------|--------------------|-----------------------------------------|------|
| 47   | 32,4               | Cis-OXYDE DE LINALOL                    | 0,02 |
| 48   | 33,3               | 6-METHYL-5-HEPTEN-2-OL                  | 0,02 |
| 49   | 33,9               | $\alpha$ -CUBEBENE                      | 0,02 |
| 50   | 34,0               | Trans-THUYANOL                          | 0,01 |
| 51   | 34,3               | Trans-OXYDE DE LINALOL                  | 0,02 |
| 52   | 34,6               | EPOXY-4,8-TERPINOLENE                   | 0,03 |
| 53   | 35,0               | CITRONELLAL                             | 0,22 |
| 54   | 35,4               | ISOGERANIAL                             | 0,13 |
| 55   | 35,6               | YLANGENE + CYCLOSATIVENE                | 0,19 |
| 56   | 36,0               | $\alpha$ -CAMPHOLENE ALDEHYDE           | 0,01 |
| 57   | 36,3               | $\alpha$ -COPAENE                       | 0,02 |
| 58   | 36,5               | DECANAL                                 | 0,16 |
| 59   | 37,0               | ISONERAL                                | 0,28 |
| 60   | 37,5               | BENZALDEHYDE                            | 0,03 |
| 61   | 37,6               | $\alpha$ -BOURBONENE                    | 0,02 |
| 62   | 37,8               | $\beta$ -BOURBONENE                     | 0,02 |
| 63   | 38,0               | 4-UNDECANONE                            | 0,04 |
| 64   | 38,6               | SESQUITERPENE                           | 0,07 |
| 65   | 38,9               | LINALOL                                 | 1,05 |
| 66   | 39,2               | PHOTOCITRAL A                           | 0,82 |
| 67   | 39,8               | SESQUITERPENE                           | 0,06 |
| 68   | 40,2               | Trans-p-MENTH-2-EN-1-OL                 | 0,05 |
| 69   | 40,8               | PHOTOCITRAL B                           | 1,17 |
| 70   | 41,5               | $\epsilon$ -CADINENE                    | 0,23 |
| 71   | 42,0               | SESQUITERPENE                           | 0,04 |
| 72   | 42,4               | $\beta$ -ELEMENE                        | 0,15 |
| 73   | 42,6               | COMPOSE Mw=166                          | 0,16 |
| 74   | 43,0               | $\beta$ -CARYOPHYLLENE + TERPINENE-4-OL | 1,42 |
| 75   | 43,5               | 6,9-GUAIADIENE                          | 0,03 |
| 76   | 44,1               | BENZOATE DE METHYLE                     | 0,02 |
| 77   | 44,2               | SESQUITERPENE                           | 0,02 |
| 78   | 46,5               | ACETATE DE CITRONELLYLE                 | 0,06 |
| 79   | 46,7               | E- $\beta$ -FARNESENE                   | 0,03 |
| 80   | 47,0               | SESQUITERPENE                           | 0,03 |

**Figure S7 (page 4/5)** – Certificate of the chemical analysis for the lot number OF20407 of *Cymbopogon citratus* (DC.) Stapf. (lemongrass) provided by Pranarôm. Screen capture made on 1st September 2020.

|    |      |                      |       |
|----|------|----------------------|-------|
| 86 | 49,4 | FORMIATE DE GERANYLE | 0,12  |
| 87 | 50,1 | GERMACRENE D         | 0,16  |
| 88 | 50,6 | $\beta$ -BISABOLENE  | 0,08  |
| 89 | 51,5 | GERANIAL             | 40,15 |
| 90 | 51,7 | ISOPIPERITENOL       | 0,02  |
| 91 | 52,1 | ACETATE DE GERANYLE  | 3,33  |
| 92 | 52,3 | CITRONELLOL          | 0,11  |

## Tableau de résultats 3 : CYMBOPOGON CITRATUS

LOT N° OF20407

| Pics | Temps de rétention | Constituants                      | %            |
|------|--------------------|-----------------------------------|--------------|
| 93   | 52,5               | δ-CADINENE                        | 0,34         |
| 94   | 52,9               | γ-CADINENE                        | 1,11         |
| 95   | 53,2               | CUMINAL                           | 0,01         |
| 96   | 53,4               | CADINA-1,4-DIENE                  | 0,04         |
| 97   | 54,2               | NEROL                             | 0,21         |
| 98   | 54,7               | Cis-ISOGERANIOL                   | 0,01         |
| 99   | 54,8               | α-AMORPHENE                       | 0,05         |
| 100  | 55,1               | Trans-ISOGERANIOL                 | 0,01         |
| 101  | 56,4               | CUPARENE                          | 0,03         |
| 102  | 57,0               | GERANIOL                          | 6,07         |
| 103  | 57,2               | CALAMENENE                        | 0,03         |
| 104  | 58,0               | COMPOSÉ FURANIQUE                 | 0,01         |
| 105  | 60,0               | BUTYRATE DE GERANYLE              | 0,14         |
| 106  | 60,1               | EPI-CUBEBOL                       | 0,06         |
| 107  | 62,0               | α-CALACORENE + PHYTADIENE ISOMERE | 0,03         |
| 108  | 62,3               | OXYDE D'HUMULENE                  | 0,01         |
| 109  | 62,9               | CUBEBOL                           | 0,17         |
| 110  | 63,2               | CYCLODODECENE                     | 0,01         |
| 111  | 64,1               | SESQUITERPENOL                    | 0,01         |
| 112  | 64,5               | CETONE CYCLOTERPENIQUE            | 0,09         |
| 113  | 65,2               | OXYDE D'ISOCARYOPHYLLENE          | 0,06         |
| 114  | 65,7               | OXYDE DE CARYOPHYLLENE            | 0,33         |
| 115  | 66,0               | EPOXYDE SESQUITERPENIQUE          | 0,01         |
| 116  | 66,8               | EPOXY-6,7-HUMULENE                | 0,01         |
| 117  | 67,6               | ACIDE CAPRYLIQUE                  | 0,04         |
| 118  | 68,1               | CETONE TERPENIQUE                 | 0,03         |
| 119  | 68,7               | SESQUITERPENOL                    | 0,03         |
| 120  | 68,8               | CARYOPHYLLENOL                    | 0,02         |
| 121  | 69,1               | Epi-CUBENOL                       | 0,03         |
| 122  | 69,6               | CUBENOL                           | 0,02         |
| 123  | 69,9               | ELEMOL                            | 0,04         |
| 124  | 70,4               | ESTER GERANIQUE                   | 0,01         |
| 125  | 72,3               | COMPOSÉ ALIPHATIQUE               | 0,01         |
| 126  | 73,6               | TRIMETHYL PENTADECANONE           | 0,02         |
| 127  | 75,0               | SESQUITERPENOL                    | 0,01         |
| 128  | 76,7               | SESQUITERPENOL                    | 0,02         |
| 129  | 78,0               | ACETATE D'EUGENYLE                | 0,01         |
| 130  | 78,6               | ACIDE CAPRIQUE                    | 0,02         |
| 131  | 79,5               | ACIDE NERIQUE                     | 0,06         |
| 132  | 81,6               | ACIDE GERANIQUE                   | 0,21         |
| 133  | 82,3               | ISOEUGENOL                        | 0,35         |
| 134  | 84,2               | EPOXYDE SESQUITERPENIQUE Mw=220   | 0,01         |
| 135  | 96,9               | COMPOSÉ AROMATIQUE Mw=286         | 0,02         |
| 136  | 101,2              | COMPOSÉ ALIPHATIQUE               | 0,02         |
| 137  | 102,0              | DIONE ALIPHATIQUE                 | 0,01         |
|      |                    | <b>TOTAL</b>                      | <b>99,91</b> |

Date de l'analyse – date of the analysis : Mai 2015,

Pranarôm Int.

Figure S7 (page 5/5) – Certificate of the chemical analysis for the lot number OF20407 of *Cymbopogon citratus* (DC.) Staph. (lemongrass) provided by Pranarôm. Screen capture made on 1st September 2020.





Figure S8 (page 1/7) – Certificate of the chemical analysis for the lot number OF19205 of *Lavandula stoechas* L. (Spanish lavender) provided by Pranarôm. Screen capture made on 1st September 2020.

# PRANARÔM

## international

### FICHE D'ANALYSE – ANALYSIS SHEET

#### Huile essentielle – Essential oil

Nom botanique – botanical name : *Lavandula stoechas* Organic  
 Nom commun – french name : LAVANDE STOECHADE BIOLOGIQUE  
 Numéro du lot – lot number: **OF19205**  
 Origine - origin: ---- PRANAROM - FRANCE  
 Partie de la plante – part of the plant : SOMMITE FLEURIE  
 Date de distillation – distillation date : 06/2015  
 Date de peremption – out of date : 06/2020

**Caractéristiques d'analyse - analysis characteristics:**

CPG - SM HEWLETT PACKARD / CPG-FID  
 Colonne : HP INNOWAX 60-0.5-0.25  
 Programmation de température : 6 mn à 50 °C – 2 °C/mn → 150°C  
 Gaz vecteur He : 23 psis 4 °C/mn → 250°C - 20mn à 250 °C

**Caractéristiques physiques – physical characteristics:**

|                                                |                                      |
|------------------------------------------------|--------------------------------------|
| Aspect - physical state                        | Liquide limpide                      |
| Couleur - colour                               | Jaune clair                          |
| Odeur - odour                                  | Caractéristique, camphrée            |
| Densité à 20°C - density                       | 0,944                                |
| Densité à 15°C - density                       | 0,947                                |
| Indice de réfraction à 20°C - refractive index | 1,472 4                              |
| Pouvoir rotatoire à 20°C - optical rotation    | + 21,5 °                             |
| Miscibilité à l'éthanol à 75% - miscibility    | 1,3 volumes d'alcool / 1 volume d'HE |
| Point d'éclair - flashpoint                    | 60,1 °C                              |

**Analyses pesticides – pesticide analysis :**

|                                                                                                                                                                                                                                                                                                                                                                                                                                                                                                                                                                                                                                                                                                                                                                                                                                                                                                                                                                                                                                                |                                                                              |
|------------------------------------------------------------------------------------------------------------------------------------------------------------------------------------------------------------------------------------------------------------------------------------------------------------------------------------------------------------------------------------------------------------------------------------------------------------------------------------------------------------------------------------------------------------------------------------------------------------------------------------------------------------------------------------------------------------------------------------------------------------------------------------------------------------------------------------------------------------------------------------------------------------------------------------------------------------------------------------------------------------------------------------------------|------------------------------------------------------------------------------|
| <b>Pesticides Organochlorés : Dosage par GC MS détecteur XSD (méthode multirésidus interne validée selon la norme NF V03-110)</b><br><b>Liste des pesticides recherchés (Pharmacopée Européenne):</b> Alachlor, Aldrine, Bromophos Ethyl, Bromophos Méthyl, Chlordane, Chlorfenvinphos, Chlorpyrifos, Chlorpyrifos Méthyl, Chlorthai Diméthyl, Cyfluthrine, Cyhalothrine lambda, Cyperméthrine, Dichlorofuamide, Dichlorvos, Dicofof (Kelthane), Dieldrine, Endosulfan, Endosulfan sulfate, Endrine, Fenchlorphos (Ronnell), Fenchlorphos-oxon, Fenvalerate, Fluralinate, Heptachlor, Heptachlor epoxide, Hexachlorobenzène, Hexachlorocyclohexane $\alpha$ , Hexachlorocyclohexane $\beta$ , Hexachlorocyclohexane $\delta$ , Hexachlorocyclohexane $\epsilon$ , Lindane, Methoxychlor, Mirex, Naled, o,p'-DDD, o,p'-DDE, o,p'-DDT, Oxymethoprene, p,p'-DDD, p,p'-DDE, p,p'-DDT, Pentachloroaniline, Pentachlorobenzène, Permethrine, Phosalone, Procymidone, Profenophos, Prothiofos, Quintozène, S421, Tecnazène, Tetradifon, Vinidiazoline | <b>Résultats</b><br><br>< LMR*<br><br>* Limite Maximale de Résidus autorisée |
| <b>Pesticides Organophosphorés : Dosage par GC MS détecteur FPD (méthode multirésidus interne validée selon la norme NF V03-110)</b><br><b>Liste des pesticides recherchés (Pharmacopée Européenne):</b> Acephate, Azinphos Ethyl, Azinphos Méthyl, Bromophos Ethyl, Bromophos Méthyl, Chlorfenvinphos, Chlorpyrifos, Chlorpyrifos Méthyl, Diazinon, Dichlorvos, Diméthoate, Ethion, Etrmiphos, Fenchlorphos (Ronnell), Fenchlorphos-oxon, Fenitrothion, Fensulfotthion (Dasanit), Fensulfotthion-oxon, Fensulfotthion-oxon-sulfone, Fensulfotthion-sulfone, Fenthion, Fenthion-oxon, Fenthion-oxon-sulfone, Fenthion-oxon-sulfoxyde, Fenthion-sulfone, Fenthion-sulfoxyde, Fonofos, Malaoxon, Malathion, Mecarbam, Methacrifos, Methamidophos (Monitor), Méthidathion, Monocrotophos, Naled, Ométhoate, Paraoxon, Paraoxon Méthyl, Parathion Ethyl, Parathion Méthyl, Phosalone, Phosmet, Pirimiphos Ethyl, Pirimiphos Méthyl, Profenophos, Prothiofos, Quinalphos.                                                                           | <b>Résultats</b><br><br>< LMR*<br><br>* Limite Maximale de Résidus autorisée |

### Profil CHROMATOGRAPHIQUE

Figure S8 (page 2/7) – Certificate of the chemical analysis for the lot number OF19205 of *Lavandula stoechas* L. (Spanish lavender) provided by Pranarôm. Screen capture made on 1st September 2020.

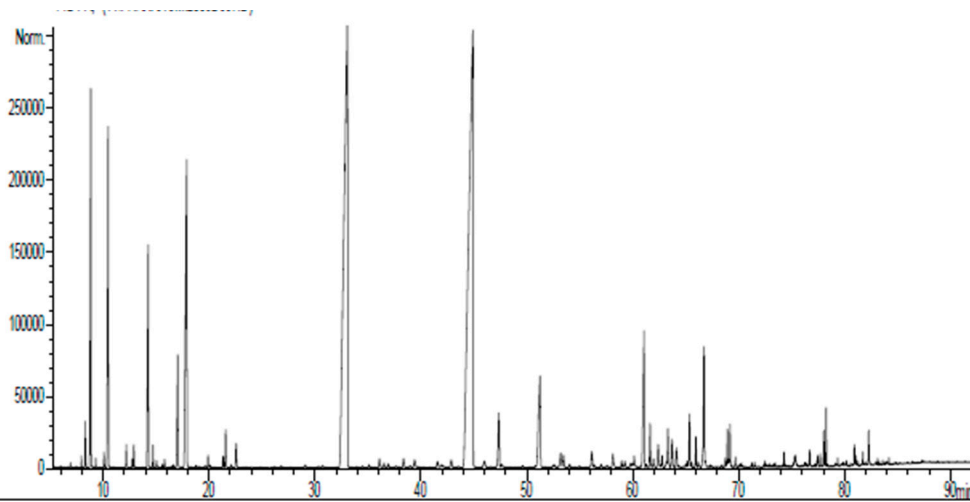



**Tableau de résultats 1 : LAVANDULA STOECHAS**  
OF19205

| Pics | Temps de rétention | Constituants                       | %    |
|------|--------------------|------------------------------------|------|
| 1    | 4,6                | ACETONE                            | 0,02 |
| 2    | 5,0                | METHYL PROPYL CYCLOPENTANE         | 0,01 |
| 3    | 5,9                | 2-METHYLBUTENAL                    | 0,01 |
| 4    | 6,0                | ISOVALERALDEHYDE                   | 0,01 |
| 5    | 6,6                | 2-ETHYL FURANE                     | 0,01 |
| 6    | 6,9                | METHYL PROPENYL CYCLOPENTANE       | 0,03 |
| 7    | 7,1                | TERPENE Mw=124                     | 0,01 |
| 8    | 7,2                | 1,2-DIMETHYL METHYLENE CYCLOHEXENE | 0,04 |

Figure S8 (page 3/7) – Certificate of the chemical analysis for the lot number OF19205 of *Lavandula stoechas* L. (Spanish lavender) provided by Pranarôm. Screen capture made on 1st September 2020.

|    |      |                                    |      |
|----|------|------------------------------------|------|
| 12 | 8,8  | 1,2-DIMETHYL METHYLENE CYCLOHEXENE | 0,02 |
| 13 | 9,0  | PRENOL                             | 0,02 |
| 14 | 9,3  | TOLUENE                            | 0,08 |
| 15 | 10,1 | $\alpha$ -FENCHENE                 | 0,15 |
| 16 | 10,5 | CAMPHERE                           | 3,94 |
| 17 | 10,9 | HEXANAL                            | 0,01 |
| 18 | 12,1 | $\beta$ -PINENE                    | 0,23 |
| 19 | 12,7 | SABINENE                           | 0,08 |
| 20 | 12,9 | PINADIENE                          | 0,23 |
| 21 | 13,1 | THUYADIENE                         | 0,01 |
| 22 | 14,3 | $\Delta^3$ -CARENE                 | 2,89 |
| 23 | 14,7 | $\beta$ -MYRCENE                   | 0,21 |
| 24 | 15,0 | $\alpha$ -PELLANDRENE              | 0,08 |
| 25 | 15,2 | $\psi$ -LIMONENE                   | 0,01 |
| 26 | 15,6 | $\alpha$ -CYMENE                   | 0,04 |
| 27 | 15,8 | $\alpha$ -TERPINENE                | 0,08 |
| 28 | 16,5 | 2,3-DEHYDRO-1,8-CINEOLE            | 0,02 |
| 29 | 16,6 | MENTHATRIENE ISOMERE               | 0,03 |
| 30 | 16,8 | ISOSYLVESTRENE                     | 0,01 |
| 31 | 17,5 | LIMONENE                           | 1,65 |
| 32 | 17,8 | 1,8-CINEOLE                        | 6,57 |
| 33 | 18,0 | MENTHATRIENE ISOMERE               | 0,08 |
| 34 | 18,2 | 2-HEXENAL                          | 0,02 |
| 35 | 18,7 | 2-PENTYL FURANE                    | 0,03 |
| 36 | 19,0 | Cis- $\beta$ -OCIMENE              | 0,02 |
| 37 | 19,1 | 2-METHYL-1-HEPTEN-6-ONE            | 0,01 |
| 38 | 19,6 | TERPENE ISOMERE                    | 0,04 |
| 39 | 19,9 | $\gamma$ -TERPINENE                | 0,15 |
| 40 | 20,1 | Trans- $\beta$ -OCIMENE            | 0,03 |
| 41 | 20,6 | MENTHATRIENE ISOMERE               | 0,01 |
| 42 | 21,3 | m-CYMENE                           | 0,14 |
| 43 | 21,5 | p-CYMENE                           | 0,47 |
| 44 | 22,0 | ISOTERPINOLENE                     | 0,05 |
| 45 | 22,5 | TERPINOLENE                        | 0,33 |

**Tableau de résultats 2 : LAVANDULA STOECHAS**  
OF19205

| Pics | Temps de rétention | Constituants                | %     |
|------|--------------------|-----------------------------|-------|
| 46   | 23,2               | DIMETHYLSTYRENE ISOMERE     | 0,01  |
| 47   | 24,0               | CYMENE ISOMERE              | 0,01  |
| 48   | 24,9               | ACETATE DE 3-HEXEN-1-OL     | 0,01  |
| 49   | 25,9               | PINOL                       | 0,01  |
| 50   | 26,2               | ACETATE DE cis-3-HEXENYLE   | 0,02  |
| 51   | 26,8               | 6-METHYL-5-HEPTEN-2-ONE     | 0,03  |
| 52   | 29,1               | COMPOSÉ AROMATIQUE          | 0,06  |
| 53   | 30,3               | 3-HEXEN-1-OL                | 0,03  |
| 54   | 30,7               | ACETATE D'OCT-1-EN-3-YLE    | 0,04  |
| 55   | 31,0               | MYRTENYL METHYL ETHER       | 0,01  |
| 56   | 33,0               | FENCHONE                    | 25,23 |
| 57   | 33,9               | PERILLENE                   | 0,02  |
| 58   | 34,4               | 2-METHYLBUTYRATE D'HEXYLE   | 0,03  |
| 59   | 35,1               | DIMETHYLSTYRENE ISOMERE     | 0,07  |
| 60   | 36,0               | α,p-DIMETHYLSTYRENE         | 0,18  |
| 61   | 36,5               | CIS-OXYDE DE LINALOL        | 0,08  |
| 62   | 36,9               | 1-OCTEN-3-OL                | 0,08  |
| 63   | 37,6               | Cis-1,2-EPOXYDE DE LIMONENE | 0,03  |
| 64   | 37,9               | COMPOSÉ AROMATIQUE Mw=150   | 0,02  |
| 65   | 38,3               | CAMPHENONE                  | 0,17  |

**Figure S8 (page 4/7)** – Certificate of the chemical analysis for the lot number OF19205 of *Lavandula stoechas* L. (Spanish lavender) provided by Pranarôm. Screen capture made on 1st September 2020.

|    |      |                                             |       |
|----|------|---------------------------------------------|-------|
| 70 | 39,7 | Trans-OXYDE DE LINALOL                      | 0,02  |
| 71 | 41,5 | CYCLOSATIVENE + YLANGENE                    | 0,14  |
| 72 | 42,0 | α-CAMPHOLENE ALDEHYDE                       | 0,15  |
| 73 | 42,9 | α-COPAENE                                   | 0,18  |
| 74 | 43,5 | CHRYSANTHENE                                | 0,06  |
| 75 | 44,9 | CAMPHE                                      | 29,60 |
| 76 | 45,5 | SESQUITERPENE                               | 0,01  |
| 77 | 45,8 | α-GURJUNENE                                 | 0,03  |
| 78 | 46,0 | ALCOOL CAMPHOLENIQUE                        | 0,16  |
| 79 | 46,5 | β-CUBEBENE                                  | 0,03  |
| 80 | 47,3 | LINALOL                                     | 1,00  |
| 81 | 47,4 | ALCOOL ALIPHATIQUE                          | 0,02  |
| 82 | 47,6 | ALCOOL CAMPHOLENIQUE ISOMERE + CETONE TERP. | 0,05  |
| 83 | 47,8 | 1-OCTANOL                                   | 0,08  |
| 84 | 48,5 | OXYDE TERPENIQUE                            | 0,01  |
| 85 | 48,8 | Trans-p-MENTH-2-EN-1-OL                     | 0,02  |
| 86 | 49,2 | DIMETHYL SULFOXIDE                          | 0,01  |
| 87 | 49,6 | PINOCARVONE                                 | 0,04  |
| 88 | 50,4 | FORMIATE DE BORNYLE                         | 0,02  |
| 89 | 50,8 | NOPINONE                                    | 0,03  |
| 90 | 51,2 | ACETATE DE BORNYLE                          | 2,60  |

### Tableau de résultats 3 : LAVANDULA STOECHAS OF19205

| Pics | Temps de rétention | Constituants                            | %    |
|------|--------------------|-----------------------------------------|------|
| 91   | 51,3               | FENCHOL                                 | 0,20 |
| 92   | 51,7               | SESQUITERPENE Mw=202                    | 0,02 |
| 93   | 52,5               | $\beta$ -ELEMENE + CETONE TERPENIQUE    | 0,05 |
| 94   | 52,6               | HYDRATE DE CAMPHENE + $\beta$ -CUBEBENE | 0,05 |
| 95   | 53,2               | $\beta$ -CARYOPHYLLENE                  | 0,34 |
| 96   | 53,4               | TERPINENE-4-OL                          | 0,25 |
| 97   | 54,0               | HOTRIENOL                               | 0,06 |
| 98   | 55,0               | DEHYDROSABINACETONE                     | 0,03 |
| 99   | 55,9               | Trans-p-2,8-MENTHADIEN-1-OL             | 0,01 |
| 100  | 56,1               | MYRTENAL                                | 0,33 |
| 101  | 56,4               | CAMPHELINOL                             | 0,05 |
| 102  | 56,5               | SABINACETONE                            | 0,02 |
| 103  | 56,9               | CADINA-3,5-DIENE                        | 0,06 |
| 104  | 57,0               | ALCOOL TERPENIQUE                       | 0,01 |
| 105  | 57,6               | SESQUITERPENE                           | 0,05 |
| 106  | 58,0               | ALLO-AROMADENDRENE                      | 0,15 |
| 107  | 58,1               | Cis-VERBENOL + Trans-PINOCARVEOL        | 0,13 |
| 108  | 58,9               | MENTHADIENOL ISOMERE                    | 0,09 |
| 109  | 59,2               | ZONARENE                                | 0,09 |
| 110  | 59,3               | LACTONE LAVANDE                         | 0,02 |
| 111  | 59,5               | Cis-p-2,8-MENTHADIEN-1-OL               | 0,02 |
| 112  | 59,8               | $\delta$ -TERPINEOL                     | 0,06 |
| 113  | 59,9               | $\alpha$ -HUMULENE                      | 0,07 |
| 114  | 60,1               | Trans-VERBENOL                          | 0,19 |
| 115  | 60,3               | $\gamma$ -SELINENE                      | 0,02 |
| 116  | 60,6               | $\gamma$ -CURCUMENE                     | 0,02 |
| 117  | 61,0               | ACETATE DE MYRTENYLE                    | 2,51 |
| 118  | 61,2               | HEPTADECANE                             | 0,06 |
| 119  | 61,4               | $\alpha$ -TERPINEOL                     | 0,25 |
| 120  | 61,6               | BORNEOL                                 | 0,32 |
| 121  | 62,0               | LEDENE                                  | 0,15 |
| 122  | 62,4               | VERBENONE                               | 0,22 |
| 123  | 62,5               | SESQUITERPENE                           | 0,20 |
| 124  | 62,6               | GERMACRENE D                            | 0,05 |

Figure S8 (page 5/7) – Certificate of the chemical analysis for the lot number OF19205 of *Lavandula stoechas* L. (Spanish lavender) provided by Pranarôm. Screen capture made on 1st September 2020.

|     |      |                                    |      |
|-----|------|------------------------------------|------|
| 129 | 63,7 | $\alpha$ -SELINENE + SESQUITERPENE | 0,45 |
| 130 | 64,1 | BICYCLOGERMACRENE + CARVONE        | 0,32 |
| 131 | 65,0 | SESQUITERPENE Mw=202               | 0,04 |
| 132 | 65,1 | ACETATE DE GERANYLE                | 0,08 |
| 133 | 65,4 | $\delta$ -CADINENE                 | 0,73 |
| 134 | 65,6 | $\gamma$ -CADINENE                 | 0,06 |
| 135 | 66,0 | $\delta$ -SELINENE                 | 0,39 |

**Tableau de résultats 4 : LAVANDULA STOECHAS**  
OF19205

| Pics | Temps de rétention | Constituants             | %    |
|------|--------------------|--------------------------|------|
| 136  | 66,2               | p-METHYLACETOPHENONE     | 0,10 |
| 137  | 66,7               | SELINA-3,7-DIENE         | 1,52 |
| 138  | 66,8               | MYRTENOL                 | 0,40 |
| 139  | 67,3               | α-AMORPHENE              | 0,03 |
| 140  | 67,5               | SESQUITERPENE Mw=202     | 0,02 |
| 141  | 68,4               | SESQUITERPENE Mw=204     | 0,05 |
| 142  | 68,7               | Trans-CARVEOL            | 0,10 |
| 143  | 68,9               | m-CYMEMOL + CALAMENENE   | 0,38 |
| 144  | 69,0               | GERANIOL                 | 0,10 |
| 145  | 69,2               | p-CYMENE-8-OL            | 0,43 |
| 146  | 69,4               | ESTER ALIPHATIQUE        | 0,02 |
| 147  | 69,6               | ESTER MYRTENIQUE         | 0,13 |
| 148  | 70,1               | COMPOSÉ Mw=220           | 0,04 |
| 149  | 70,3               | ESTER MYRTENIQUE         | 0,05 |
| 150  | 71,2               | COMPOSÉ INDENIQUE Mw=188 | 0,05 |
| 151  | 71,5               | Epi-CUBEBOL              | 0,07 |
| 152  | 72,5               | α-CALACORENE             | 0,06 |
| 153  | 72,6               | PIPERITONE               | 0,03 |
| 154  | 72,7               | OXYDE D'HUMULENE         | 0,03 |
| 155  | 72,9               | PALUSTROL                | 0,04 |
| 156  | 73,2               | CUBEBOL                  | 0,04 |
| 157  | 73,4               | COMPOSÉ AROMATIQUE       | 0,05 |
| 158  | 74,2               | COMPOSÉ Mw=218           | 0,14 |
| 159  | 74,5               | COMPOSÉ AROMATIQUE       | 0,03 |
| 160  | 74,8               | OXYDE D'ISOCARYOPHYLLENE | 0,02 |
| 161  | 75,2               | OXYDE DE CARYOPHYLLENE   | 0,12 |
| 162  | 75,4               | METHYL EUGENOL           | 0,16 |
| 163  | 75,6               | CETONE TERPENIQUE        | 0,04 |
| 164  | 75,5               | SESQUITERPENOL           | 0,02 |
| 165  | 76,2               | SESQUITERPENOL           | 0,06 |
| 166  | 76,4               | COMPOSÉ CETONIQUE        | 0,05 |
| 167  | 76,7               | LEDOL                    | 0,22 |
| 168  | 77,2               | EPOXY-6,7-HUMULENE       | 0,03 |
| 169  | 77,3               | GLEENOL                  | 0,06 |
| 170  | 77,5               | Epi-CUBENOL              | 0,10 |
| 171  | 77,6               | CUBENOL                  | 0,14 |
| 172  | 77,8               | SESQUITERPENOL           | 0,15 |
| 173  | 78,0               | COPAENOL ISOMERE         | 0,24 |
| 174  | 78,2               | VIRIDIFLOROL             | 0,52 |
| 175  | 78,4               | ROSIFOLIOL               | 0,02 |
| 176  | 79,1               | TRIMETHYL PENTADECANONE  | 0,04 |
| 177  | 79,3               | SPATHULENOL              | 0,10 |
| 178  | 79,7               | SESQUITERPENOL           | 0,07 |
| 179  | 79,9               | SESQUITERPENOL           | 0,08 |
| 180  | 80,2               | SESQUITERPENOL Mw=220    | 0,07 |

Figure S8 (page 6/7) – Certificate of the chemical analysis for the lot number OF19205 of *Lavandula stoechas* L. (Spanish lavender) provided by Pranarôm. Screen capture made on 1st September 2020.

**Tableau de résultats 5 : LAVANDULA STOECHAS**  
OF19205

| Pics | Temps de rétention | Constituants                 | %            |
|------|--------------------|------------------------------|--------------|
| 181  | 80,6               | T-CADINOL                    | 0,04         |
| 182  | 80,9               | DEHYDROVIRIDIFLOROL          | 0,22         |
| 183  | 81,0               | $\alpha$ -MUUROL             | 0,10         |
| 184  | 81,3               | SESQUITERPENOL               | 0,06         |
| 185  | 81,7               | GERANYL- $\alpha$ -TERPINENE | 0,16         |
| 186  | 81,9               | SPATHULENOL ISOMERE          | 0,03         |
| 187  | 82,3               | $\alpha$ -CADINOL            | 0,36         |
| 188  | 82,4               | CADALENE                     | 0,02         |
| 189  | 82,9               | SESQUITERPENOL               | 0,07         |
| 190  | 83,1               | SESQUITERPENONE Mw=218       | 0,06         |
| 191  | 83,6               | GERANYL-p-CYMENE ISOMERE     | 0,04         |
| 192  | 83,8               | SESQUITERPENOL               | 0,06         |
| 193  | 84,1               | MAALIOL ISOMERE              | 0,07         |
| 194  | 84,2               | ACETATE D'EUGENYLE           | 0,01         |
| 195  | 84,8               | COMPOSE METHOXY AROMATIQUE   | 0,02         |
| 196  | 86,4               | COMPOSE AROMATIQUE           | 0,02         |
| 197  | 87,3               | SESQUITERPENONE Mw=218       | 0,02         |
|      |                    | <b>TOTAL</b>                 | <b>99,69</b> |

Date de l'analyse – date of the analysis : Juin 2015,

Pranarôm Int.  
C. Schulze  
Contrôle qualité

**Figure S8 (page 7/7)** – Certificate of the chemical analysis for the lot number OF19205 of *Lavandula stoechas* L. (Spanish lavender) provided by Pranarôm. Screen capture made on 1st September 2020.



## NOTE D'ANALYSE – ANALYSIS SHEET

### Huile essentielle – Essential oil

Nom botanique – botanical name : *Origanum compactum*  
 Nom commun – french name : ORIGAN COMPACT  
 Numéro du lot – lot number : OF22429  
 Origine - origin : --- PRANARÔM - MAROC  
 Partie de la plante – part of the plant : SOMMITÉ FLEURIE  
 Date de distillation – distillation date : 06/2015  
 Date de péremption – out of date : 02/2021

#### Caractéristiques d'analyse – analysis characteristics:

CPG - SM HEWLETT PACKARD / CPG-FID  
 Colonne : HP INNOWAX 60-0.5-0.25  
 Programmation de température : 6 mn à 50°C -2°C/mn → 250°C-10mn à 250°C  
 Gaz vecteur He : 22 psis

#### Caractéristiques physiques – physical characteristics:

|                                                |                                      |
|------------------------------------------------|--------------------------------------|
| Aspect – physical state                        | Liquide limpide                      |
| Couleur - colour                               | Jaune d'or clair                     |
| Odeur - odour                                  | Caractéristique, phénolique          |
| Densité à 20°C - density                       | 0,938                                |
| Densité à 15°C - density                       | 0,941                                |
| Indice de réfraction à 20°C - refractive index | 1,505 2                              |
| Pouvoir rotatoire à 20°C – optical rotation    | 0 °                                  |
| Miscibilité à l'éthanol à 80% - miscibility    | 1,1 volumes d'alcool / 1 volume d'HE |
| Point d'éclair : SETAFLASH - flashpoint        | 63,4 °C                              |

#### Analyses pesticides – pesticide analysis :

|                                                                                                                                                                                                                                                                                                                                                                                                                                                                                                                                                                                                                                                                                                                                                                                                                                                                                                                                                                                                                                                                                           |                                                                                        |
|-------------------------------------------------------------------------------------------------------------------------------------------------------------------------------------------------------------------------------------------------------------------------------------------------------------------------------------------------------------------------------------------------------------------------------------------------------------------------------------------------------------------------------------------------------------------------------------------------------------------------------------------------------------------------------------------------------------------------------------------------------------------------------------------------------------------------------------------------------------------------------------------------------------------------------------------------------------------------------------------------------------------------------------------------------------------------------------------|----------------------------------------------------------------------------------------|
| <p><b>Pesticides Organochlorés : Dosage par GC MS détecteur XSD (méthode multirésidus interne validée selon la norme NF V03-110)</b><br/> <b>Liste des pesticides recherchés (Pharmacopée Européenne):</b> Alachlor, Aldrine, Bromophos Ethyl, Bromophos Methyl, Chlordane, Chlorfenvinphos, Chlorpyrifos, Chlorpyrifos Methyl, Chlorthal Dimethyl, Cyfluthrine, Cyhalothrine lambda, Cyperméthrine, Dichlorofuamide, Dichlorvos, Dicofol (Kethane), Dieldrine, Endosulfan, Endosulfan sulfate, Endrine, Fenchlorphos (Ronnell), Fenchlorphos-oxon, Fenvalerate, Fluralinate, Heptachlor, Heptachlor epoxide, Hexachlorobenzène, Hexachlorocyclohexane <math>\alpha</math>, Hexachlorocyclohexane <math>\beta</math>, Hexachlorocyclohexane <math>\delta</math>, Hexachlorocyclohexane <math>\epsilon</math>, Lindane, Methoxychlor, Mirex, Naled, o,p'-DDD, o,p'-DDE, o,p'-DDT, Oxymethopros, p,p'-DDD, p,p'-DDE, p,p'-DDT, Pentachloroaniline, Pentachloroisole, Permethrine, Phosalone, Procymidone, Profenophos, Prothiofos, Quintozène, S421, Tecnazène, Tetradifon, Viniozoline</p> | <p><b>Résultats</b></p> <p>&lt; LMR*</p> <p>* Limite Maximale de Résidus autorisée</p> |
| <p><b>Pesticides Organophosphorés : Dosage par GC MS détecteur FPD (méthode multirésidus interne validée selon la norme NF V03-110)</b><br/> <b>Liste des pesticides recherchés (Pharmacopée Européenne):</b> Acephate, Azinphos Ethyl, Azinphos Methyl, Bromophos Ethyl, Bromophos Methyl, Chlorfenvinphos, Chlorpyrifos, Chlorpyrifos Methyl, Diazinon, Dichlorvos, Diméthoate, Ethion, Etrimpfos, Fenchlorphos (Ronnell), Fenchlorphos-oxon, Fentrotion, Fensulfotlion (Dasanit), Fensulfotlion-oxon, Fensulfotlion-oxon-sulfone, Fensulfotlion-sulfone, Fenthion, Fenthion-oxon, Fenthion-oxon-sulfone, Fenthion-oxon-sulfoxyde, Fenthion-sulfone, Fenthion-sulfoxyde, Fonofos, Malaaxon, Malathion, Mecarbam, Methacrifos, Methamidophos (Monitor), Methidathion, Monocrotophos, Naled, Ométhoate, Paraaxon, Paraaxon Methyl, Parathion Ethyl, Parathion Methyl, Phosalone, Phosmet, Pirimiphos Ethyl, Pirimiphos Methyl, Profenophos, Prothiofos, Quinalphos.</p>                                                                                                                   | <p><b>Résultats</b></p> <p>&lt; LMR*</p> <p>* Limite Maximale de Résidus autorisée</p> |

## Profil CHROMATOGRAPHIQUE

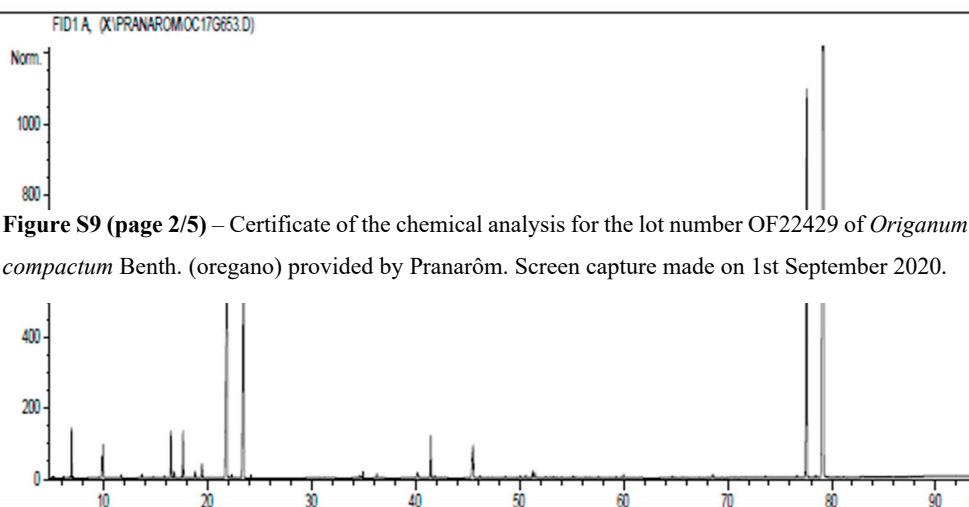



**Tableau de résultats 1 : ORIGANUM COMPACTUM**  
OF22429

| Pics | Temps de rétention | Constituants            | %    |
|------|--------------------|-------------------------|------|
| 1    | 5,1                | ACETONE                 | 0,02 |
| 2    | 6,2                | FORMIATE D'ETHYLE       | 0,02 |
| 3    | 6,8                | 2-METHYL BUTANAL        | 0,04 |
| 4    | 6,9                | ISOVALERALDEHYDE        | 0,84 |
| 5    | 7,5                | 2-ETHYL FURANE          | 0,01 |
| 6    | 9,4                | TRICYCLENE              | 0,01 |
| 7    | 9,6                | ISOVALERATE DE METHYLE  | 0,02 |
| 8    | 9,8                | $\alpha$ -PINENE        | 0,59 |
| 9    | 9,9                | $\alpha$ -THUYENE       | 0,88 |
| 10   | 11,6               | PENTANOATE D'ETHYLE     | 0,01 |
| 11   | 11,7               | CAMPHENE                | 0,09 |
| 12   | 13,7               | $\beta$ -PINENE         | 0,12 |
| 13   | 14,5               | SABINENE                | 0,01 |
| 14   | 14,8               | PINADIENE               | 0,01 |
| 15   | 15,0               | 4-METHYL-3-PENTEN-2-ONE | 0,03 |
| 16   | 15,8               | $\Delta^3$ -CARENE      | 0,07 |
| 17   | 16,0               | 3-HEPTANONE             | 0,01 |
| 18   | 16,5               | $\beta$ -MYRCENE        | 1,47 |
| 19   | 16,8               | $\alpha$ -PHELLANDRENE  | 0,19 |
| 20   | 17,0               | $\psi$ -LIMONENE        | 0,01 |
| 21   | 17,6               | $\alpha$ -TERPINENE     | 1,57 |

**Figure S9 (page 3/5)** – Certificate of the chemical analysis for the lot number OF22429 of *Origanum compactum* Benth. (oregano) provided by Pranarôm. Screen capture made on 1st September 2020.

|    |      |                             |       |
|----|------|-----------------------------|-------|
| 26 | 20,1 | 2-HEXENAL                   | 0,01  |
| 27 | 20,9 | Cis- $\beta$ -OCIMENE       | 0,01  |
| 28 | 21,8 | $\gamma$ -TERPINENE         | 12,79 |
| 29 | 22,0 | Trans- $\beta$ -OCIMENE     | 0,07  |
| 30 | 22,3 | 3-OCTANONE                  | 0,11  |
| 31 | 23,1 | m-CYMENE                    | 0,01  |
| 32 | 23,4 | p-CYMENE                    | 10,22 |
| 33 | 24,2 | TERPINOLENE                 | 0,08  |
| 34 | 30,6 | 3-HEXEN-1-OL                | 0,01  |
| 35 | 31,2 | 3-OCTANOL                   | 0,01  |
| 36 | 31,7 | MENTHATRIENE ISOMERE        | 0,01  |
| 37 | 33,2 | $\alpha$ -THUYONE           | 0,01  |
| 38 | 33,9 | CETONE TERPENIQUE           | 0,01  |
| 39 | 34,2 | MENTHATRIENE ISOMERE        | 0,03  |
| 40 | 34,6 | $\alpha$ ,p-DIMETHYLSTYRENE | 0,09  |
| 41 | 34,8 | MENTHATRIENE ISOMERE        | 0,06  |
| 42 | 34,9 | 1-OCTEN-3-OL                | 0,20  |
| 43 | 35,2 | FURFURAL                    | 0,01  |
| 44 | 36,3 | Trans-THUYANOL              | 0,15  |
| 45 | 36,6 | EPOXY-4,8-TERPINOLENE       | 0,01  |

## Tableau de résultats 2 : ORIGANUM COMPACTUM

OF22429

| Pics | Temps de rétention | Constituants                            | %    |
|------|--------------------|-----------------------------------------|------|
| 46   | 36,7               | Trans-OXYDE DE LINALOL                  | 0,02 |
| 47   | 37,6               | ALDEHYDE TERPENIQUE                     | 0,01 |
| 48   | 38,6               | $\alpha$ -COPAENE                       | 0,01 |
| 49   | 39,6               | EPOXYDE TERPENIQUE                      | 0,01 |
| 50   | 39,9               | EPOXYDE TERPENIQUE                      | 0,03 |
| 51   | 40,1               | CAMPRE                                  | 0,23 |
| 52   | 40,2               | CÉTONE TERPENIQUE Mw=152                | 0,07 |
| 53   | 41,0               | $\beta$ -BOURBONENE                     | 0,01 |
| 54   | 41,4               | $\alpha$ -GURJUNENE                     | 0,01 |
| 55   | 41,5               | LINALOL                                 | 1,36 |
| 56   | 41,6               | 1-NONEN-3-OL                            | 0,02 |
| 57   | 41,8               | Cis-THUYANOL                            | 0,07 |
| 58   | 42,1               | $\beta$ 1-CUBEBENE                      | 0,02 |
| 59   | 42,5               | 4-ACETYL-1-METHYLCYCLOHEXENE            | 0,02 |
| 60   | 42,8               | Trans-p-MENTH-2-EN-1-OL                 | 0,03 |
| 61   | 43,5               | MENTHADIENE ISOMERE                     | 0,02 |
| 62   | 45,4               | METHYL CARVACROL ETHER                  | 0,73 |
| 63   | 45,5               | $\beta$ -CARYOPHYLLENE + TERPINENE-4-OL | 1,36 |
| 64   | 46,2               | Cis-DIHYDROCARVONE + AROMADENDRENE      | 0,10 |
| 65   | 46,9               | Trans-DIHYDROCARVONE                    | 0,03 |
| 66   | 47,3               | Cis-p-MENTH-2-EN-1-OL                   | 0,02 |
| 67   | 48,4               | $\alpha$ -HIMACHALENE                   | 0,02 |
| 68   | 48,6               | ALLO-AROMADENDRENE + COMPOSÉ Mw= 152    | 0,05 |
| 69   | 49,3               | ZONARENE                                | 0,01 |
| 70   | 49,7               | $\delta$ -TERPINEOL                     | 0,02 |
| 71   | 50,0               | $\alpha$ -HUMULENE                      | 0,09 |
| 72   | 50,6               | NERAL                                   | 0,08 |
| 73   | 50,8               | CARVOTANACETONE                         | 0,02 |
| 74   | 51,2               | $\alpha$ -TERPINEOL                     | 0,26 |
| 75   | 51,4               | BORNEOL                                 | 0,20 |
| 76   | 51,6               | SESQUITERPENE                           | 0,01 |
| 77   | 51,8               | LEDENE                                  | 0,02 |
| 78   | 52,4               | VERBENONE + $\beta$ -HIMACHALENE        | 0,06 |
| 79   | 52,9               | COMPOSÉ TERPENIQUE Mw=152               | 0,04 |
| 80   | 53,2               | $\beta$ -BISABOLENE                     | 0,05 |

Figure S9 (page 4/5) – Certificate of the chemical analysis for the lot number OF22429 of *Origanum compactum* Benth. (oregano) provided by Pranarôm. Screen capture made on 1st September 2020.

|    |      |                      |      |
|----|------|----------------------|------|
| 85 | 54,8 | 1-DECANOL            | 0,01 |
| 86 | 55,1 | $\delta$ -CADINENE   | 0,08 |
| 87 | 55,4 | $\gamma$ -CADINENE   | 0,04 |
| 88 | 56,3 | METHYLACETOPHENONE   | 0,01 |
| 89 | 56,4 | MENTHADIENOL ISOMERE | 0,01 |
| 90 | 56,7 | CUMINAL              | 0,01 |

### Tableau de résultats 3 : ORIGANUM COMPACTUM

OF22429

| Pics | Temps de rétention | Constituants                          | %     |
|------|--------------------|---------------------------------------|-------|
| 91   | 56,8               | MYRTENOL + CURCUMENE ISOMERE          | 0,01  |
| 92   | 57,6               | SABINOL ISOMERE                       | 0,04  |
| 93   | 57,7               | 2-HYDROXY PIPERITONE                  | 0,01  |
| 94   | 58,1               | SABINOL ISOMERE                       | 0,01  |
| 95   | 58,6               | CURCUMENE ISOMERE                     | 0,01  |
| 96   | 59,3               | Trans-CARVEOL                         | 0,04  |
| 97   | 59,7               | CALAMENENE                            | 0,01  |
| 98   | 60,0               | p-CYMENE-8-OL + ACETATE DE CARVACRYLE | 0,12  |
| 99   | 60,9               | ESTER TERPENIQUE                      | 0,01  |
| 100  | 61,7               | ESTER TERPENIQUE                      | 0,03  |
| 101  | 64,7               | METHYL CARVACROL                      | 0,04  |
| 102  | 65,6               | COMPOSÉ Mw=166                        | 0,02  |
| 103  | 67,3               | METHYL PROPENYL PHENOL Mw=148         | 0,01  |
| 104  | 68,3               | OXYDE D'ISOCARYOPHYLLENE              | 0,01  |
| 105  | 68,6               | OXYDE DE CARYOPHYLLENE                | 0,16  |
| 106  | 73,6               | CUMINOL                               | 0,09  |
| 107  | 75,4               | SPATHULENOL                           | 0,01  |
| 108  | 76,6               | ISOTHYMOL                             | 0,08  |
| 109  | 77,2               | COMPOSÉ ACÉTOXY CÉTONIQUE             | 0,01  |
| 110  | 77,6               | THYMOL                                | 14,89 |
| 111  | 78,4               | ISOCARVACROL                          | 0,09  |
| 112  | 79,2               | CARVACROL                             | 48,08 |
| 113  | 80,4               | COMPOSÉ PHÉNOLIQUE                    | 0,02  |
| 114  | 81,1               | COMPOSÉ PHÉNOLIQUE                    | 0,01  |
| 115  | 83,0               | VINYL-QUAJACOL                        | 0,03  |
| 116  | 83,8               | CARYOPHYLLA-3,7-DIEN-6-OL             | 0,01  |
| 117  | 85,5               | COMPOSÉ PHÉNOLIQUE                    | 0,01  |
| 118  | 87,4               | COMPOSÉ PHÉNOLIQUE                    | 0,02  |
| 119  | 88,9               | COMPOSÉ PHÉNOLIQUE                    | 0,03  |
|      |                    | TOTAL                                 | 99,99 |

Date de l'analyse – date of the analysis : Mars 2016,

Pranarôm Int.  
C. Schulze  
Contrôle qualité

**Figure S9 (page 5/5)** – Certificate of the chemical analysis for the lot number OF22429 of *Origanum compactum* Benth. (oregano) provided by Pranarôm. Screen capture made on 1st September 2020.

## FICHE D'ANALYSE – ANALYSIS SHEET Huile essentielle - Essential oil

Nom botanique – botanical name: *Cymbopogon martinii*  
 Nom commun – french name: PALMAROSA  
 Numéro du lot – lot number: OF21237  
 Origine - origin: --- PRANARŌM -NEPAL  
 Partie de la plante – part of the plant: PARTIE AERIENNE  
 Date de distillation – distillation date: 06/2014  
 Date de péremption – out of date: 03/2020

### Caractéristiques d'analyse – analysis characteristics:

CPG - SM HEWLETT PACKARD / CPG-FID  
 Colonne : HP INNOWAX 60-0.5-0.25  
 Programmation de température : 6 mn à 50 °C –2 °C/mn→250 °C-10mn à 250 °C  
 Gaz vecteur He : 22 psis

### Caractéristiques physiques – physical characteristics:

|                                                |                                      |
|------------------------------------------------|--------------------------------------|
| Aspect – physical state                        | Liquide limpide                      |
| Couleur - colour                               | Jaune pâle                           |
| Odeur - odour                                  | Rosée et herbacée                    |
| Densité à 20°C - density                       | 0,885                                |
| Densité à 15°C - density                       | 0,889                                |
| Indice de réfraction à 20°C - refractive index | 1,475 4                              |
| Pouvoir rotatoire à 20°C - optical rotation    | - 0,5 °                              |
| Miscibilité à l'éthanol à 70% - miscibility    | 1,2 volumes d'alcool / 1 volume d'HE |
| Point d'éclair : SETAFLASH - flashpoint        | 100,8 °C                             |

### Analyses pesticides – pesticide analysis :

|                                                                                                                                                                                                                                                                                                                                                                                                                                                                                                                                                                                                                                                                                                                                                                                                                                                                                                                                                                                                                                            |                                                                              |
|--------------------------------------------------------------------------------------------------------------------------------------------------------------------------------------------------------------------------------------------------------------------------------------------------------------------------------------------------------------------------------------------------------------------------------------------------------------------------------------------------------------------------------------------------------------------------------------------------------------------------------------------------------------------------------------------------------------------------------------------------------------------------------------------------------------------------------------------------------------------------------------------------------------------------------------------------------------------------------------------------------------------------------------------|------------------------------------------------------------------------------|
| <b>Pesticides Organochlorés : Dosage par GC MS détecteur XSD (méthode multirésidus interne validée selon la norme NF V03-110)</b><br><b>Liste des pesticides recherchés (Pharmacopée Européenne):</b> Alachlor, Aldrine, Bromophos Ethyl, Bromophos Méthyl, Chlordane, Chlorfenvinphos, Chlorpyrifos, Chlorpyrifos Méthyl, Chlorothal Diméthyl, Cyfuthrine, Cyhalothrine lambda, Cyperméthrine, Dichlofuanide, Dichlorvos, Dicofol (Kelthane), Dieldrine, Endosulfan, Endosulfan sulfate, Endrine, Fenchlorphos (Ronnel), Fenchlorphos-oxon, Fenvalerate, Fluralinate, Heptachlor, Heptachlor epoxide, Hexachlorobenzène, Hexachlorocyclohexane $\alpha$ , Hexachlorocyclohexane $\beta$ , Hexachlorocyclohexane $\delta$ , Hexachlorocyclohexane $\epsilon$ , Lindane, Méthoxychlor, Mirex, Naled, o,p'-DDD, o,p'-DDE, o,p'-DDT, Oxyméthorane, p,p'-DDD, p,p'-DDE, p,p'-DDT, Pentachloroaniline, Pentachloroanisole, Permethrine, Phosalone, Procyimdone, Profenophos, Prothiofos, Quintozène, S421, Technazène, Tetradifon, Vinclozoline | <b>Résultats</b><br><br>< LMR*<br><br>* Limite Maximale de Résidus autorisée |
| <b>Pesticides Organophosphorés : Dosage par GC MS détecteur FPD (méthode multirésidus interne validée selon la norme NF V03-110)</b><br><b>Liste des pesticides recherchés (Pharmacopée Européenne):</b> Acephate, Azinphos Ethyl, Azinphos Méthyl, Bromophos Ethyl, Bromophos Méthyl, Chlorfenvinphos, Chlorpyrifos, Chlorpyrifos Méthyl, Diazinon, Dichlorvos, Diméthoate, Ethion, Etriphos, Fenchlorphos (Ronnel), Fenchlorphos-oxon, Fenitrothion, Fensulfotlion (Dasanit), Fensulfotlion-oxon, Fensulfotlion-oxon-sulfone, Fensulfotlion-sulfone, Fenthion, Fenthion-oxon, Fenthion-oxon-sulfone, Fenthion-oxon-sulfoxyde, Fenthion-sulfone, Fenthion-sulfoxyde, Fonofos, Malaoxon, Malathion, Mecarbam, Methacrfos, Methamidophos (Monitor), Methidathion, Monocrotophos, Naled, Ométhoate, Paraaxon, Paraaxon Méthyl, Parathion Ethyl, Parathion Méthyl, Phosalone, Phosmet, Pirimiphos Ethyl, Pirimiphos Méthyl, Profenophos, Prothiofos, Quinalphos.                                                                              | <b>Résultats</b><br><br>< LMR*<br><br>* Limite Maximale de Résidus autorisée |

**Figure S10 (page 1/4)** – Certificate of the chemical analysis for the lot number OF21237 of *Cymbopogon martinii* var. *motia* (Roxb.) W.Watson (palmarosa) provided by Pranarôm. Screen capture made on 1st September 2020.

### Profil CHROMATOGRAPHIQUE

Figure S10 (page 2/4) – Certificate of the chemical analysis for the lot number OF21237 of *Cymbopogon martinii* var. *motia* (Roxb.) W.Watson (palmarosa) provided by Pranarôm. Screen capture made on 1st September 2020.

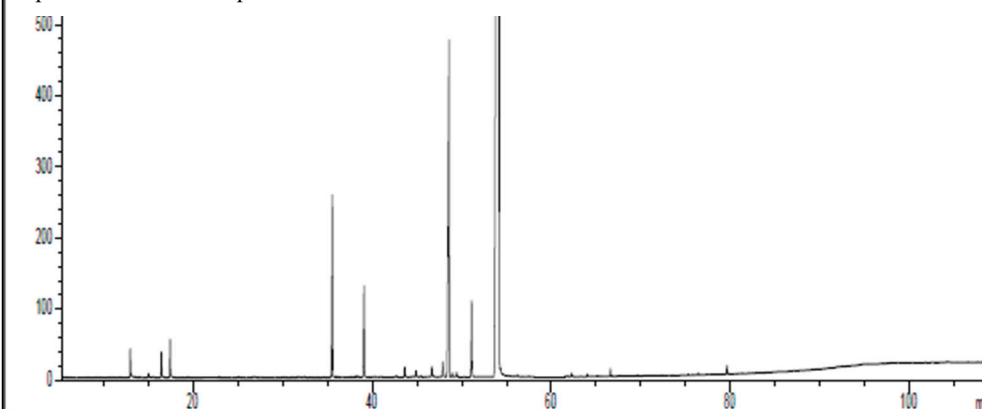

**Tableau de résultats 1 : CYMBOPOGON MARTINII**  
**LOT OF21237**

| Pics | Temps de rétention | Constituants           | %    |
|------|--------------------|------------------------|------|
| 1    | 5,2                | ACETONE                | 0,01 |
| 2    | 9,6                | CAMPHERE               | 0,01 |
| 3    | 11,0               | $\beta$ -PINENE        | 0,01 |
| 4    | 11,8               | $\Delta$ 2-CARENE      | 0,01 |
| 5    | 13,0               | $\beta$ -MYRCENE       | 0,47 |
| 6    | 13,5               | $\alpha$ -PHELLANDRENE | 0,02 |
| 7    | 14,0               | $\alpha$ -CYMENE       | 0,01 |
| 8    | 15,0               | LIMONENE               | 0,07 |

**Figure S10 (page 3/4)** – Certificate of the chemical analysis for the lot number OF21237 of *Cymbopogon martinii* var. *motia* (Roxb.) W.Watson (palmarosa) provided by Pranarôm. Screen capture made on 1st September 2020.

|    |      |                          |      |
|----|------|--------------------------|------|
| 14 | 26,7 | ALLO-OCIMENE             | 0,03 |
| 15 | 31,7 | CITRONELLAL              | 0,02 |
| 16 | 32,4 | $\alpha$ -COPAENE        | 0,02 |
| 17 | 34,7 | PLINOL ISOMERE           | 0,01 |
| 18 | 35,5 | LINALOL                  | 2,89 |
| 19 | 40,1 | $\beta$ 1-CUBEBENE       | 0,01 |
| 20 | 40,6 | 1-OCTANOL                | 0,02 |
| 21 | 40,7 | ACETATE DE LINALYLE      | 0,02 |
| 22 | 41,9 | SESQUITERPENE            | 0,01 |
| 23 | 42,5 | ISOCARYOPHYLLENE         | 0,01 |
| 24 | 42,6 | ESTER ALIPHATIQUE        | 0,01 |
| 25 | 38,5 | $\beta$ -ELEMENE         | 0,02 |
| 26 | 38,2 | PLINOL ISOMERE           | 0,03 |
| 27 | 39,1 | $\beta$ -CARYOPHYLLENE   | 1,75 |
| 28 | 40,4 | SESQUITERPENE            | 0,01 |
| 29 | 40,9 | SESQUITERPENE            | 0,01 |
| 30 | 41,0 | GUAIADIENE ISOMERE       | 0,01 |
| 31 | 42,6 | SESQUITERPENE            | 0,02 |
| 32 | 42,7 | SESQUITERPENE            | 0,02 |
| 33 | 43,6 | $\alpha$ -HUMULENE       | 0,20 |
| 34 | 44,9 | NERAL                    | 0,13 |
| 35 | 45,4 | SESQUITERPENE            | 0,01 |
| 36 | 45,8 | $\gamma$ -MUUROLENE      | 0,02 |
| 37 | 46,1 | FORMIATE DE GERANYLE     | 0,01 |
| 38 | 46,3 | GERMACRENE D             | 0,01 |
| 39 | 46,6 | ACETATE DE NERYLE        | 0,23 |
| 40 | 46,8 | VALENCENE                | 0,02 |
| 41 | 47,4 | $\beta$ -CURCUMENE       | 0,01 |
| 42 | 47,9 | GERANIAL                 | 0,31 |
| 43 | 48,6 | ACETATE DE GERANYLE      | 8,49 |
| 44 | 48,7 | E,E- $\alpha$ -FARNESENE | 0,01 |
| 45 | 48,9 | CITRONELLOL              | 0,08 |



## Tableau de résultats 2 : CYMBOPOGON MARTINII

LOT OF21237

| Pics | Temps de rétention | Constituants               | %     |
|------|--------------------|----------------------------|-------|
| 46   | 49,4               | Cis- $\alpha$ -BISABOLENE  | 0,10  |
| 47   | 51,1               | NEROL                      | 1,33  |
| 48   | 54,2               | GERANIOL                   | 81,92 |
| 49   | 54,3               | ISOGERANIOL                | 0,04  |
| 50   | 56,2               | BUTYRATE DE GERANYLE       | 0,02  |
| 51   | 57,5               | METHYLBUTYRATE DE GERANYLE | 0,01  |
| 52   | 51,6               | ALCOOL TERPENIQUE Mw=152   | 0,01  |
| 53   | 61,7               | OXYDE D'ISOCARYOPHYLLENE   | 0,02  |
| 54   | 61,9               | Z-NEROLIDOL                | 0,01  |
| 55   | 62,3               | OXYDE DE CARYOPHYLLENE     | 0,07  |
| 56   | 64,0               | E-NEROLIDOL                | 0,04  |
| 57   | 65,1               | EPOXY-6,7-HUMULENE         | 0,01  |
| 58   | 66,6               | CAPROATE DE GERANYLE       | 0,12  |
| 59   | 67,7               | ESTER GERANIQUE            | 0,01  |
| 60   | 69,6               | COMPOSE ALIPHATIQUE        | 0,02  |
| 61   | 75,3               | ACETATE DE FARNESYLE       | 0,01  |
| 62   | 76,4               | ESTER GERANIQUE            | 0,03  |
| 63   | 79,6               | FARNESOL                   | 0,15  |
|      |                    | TOTAL                      | 99,99 |

Date de l'analyse – date of the analysis : Mars 2015,

Pranarôm Int.

Figure S10 (page 4/4) – Certificate of the chemical analysis for the lot number OF21237 of *Cymbopogon martinii* var. *motia* (Roxb.) W.Watson (palmarosa) provided by Pranarôm. Screen capture made on 1st September 2020.
